# Supplementary material for: Pervasive supply of therapeutic lysosomal enzymes in the CNS of normal and Krabbe‐affected non‐human primates by intracerebral lentiviral gene therapy
Source: PubMed Central journal article supplement (PMC5128736; doi:10.15252/emmm.201505850), 2016-03-29
Supplement: EMMM-8-489-s001.pdf [file EMMM-8-489-s001.pdf]

## Appendix

### Table of contents

- **Appendix Supplementary Methods**

- Mouse studies
- In vitro studies
- Surgical and post-surgical monitoring
- Magnetic Resonance Imaging
- Tissue collection and processing
- Quantification of VCN
- Western blot analyses
- Histopathology
- Primary and secondary antibodies
- ELISA assay
- p24 enzyme-linked immunosorbent assay

- **Appendix Supplementary Figures**

- Appendix Fig. S1. Intracerebral injection of LV.hARSA in MLD mice.
- Appendix Fig. S2. Post-surgery follow-up of LV.hARSA-injected NHP.
- Appendix Fig. S3. ARSA expression in neurons and glial cells in the injected and contralateral hemisphere.
- Appendix Fig. S4. VCN distribution in LV.hARSA-injected NHP.
- Appendix Fig. S5. Expression of transgenic hARSA.
- Appendix Fig. S6. Validation of LV.hGALC in vitro and in a Krabbe murine model.
- Appendix Fig. S7. Necropsy and tissue collection of Krabbe-affected NHP

- **Appendix Supplementary tables**

- Appendix Table S1. LV.GFP- and LV.ARSA-injected NHP
- Appendix Table S2. Lentiviral vectors batches.
- Appendix Table S3. CED parameters used for intracerebral infusion of LV suspension in normal NHP.
- Appendix Table S4. Volume of injected vector suspension calculated based on post-surgery MRI scans.
- Appendix Table S5. Score of pathological lesions in the injected areas of LV.hARSA-treated NHP.
- Appendix Table S6. Gene Ontology (GO) analysis of genes targeted by LV integrations
- Appendix Table S7. LV.hGALC-injected NHP and untreated controls
- Appendix Table S8. Neurobehavioral assessment: modified infant neurobehavioral assessment scale (NBAS).
- Appendix Table S9. Neurobehavioral assessment: modified Bayley's scale for infant development.
- Appendix Table S10. Summary of statistics for the main figures and tables.

- **References**

## **Appendix Supplementary methods**

### **Mouse studies**

GALC-deficient Twitcher mice (mixed background of C57BL6 and FVB) and ARSA knockout mice (As2<sup>-/-</sup> or MLD mice) have been previously described (Lattanzi *et al*, 2010; Neri *et al*, 2011). Twitcher and MLD mice (males and females) were injected in the external capsule with LV.hGALC and LV.hARSA, respectively (single unilateral injection,  $2 \times 10^6$  TU/2 $\mu$ l) (Lattanzi *et al*, 2010). Mice were analyzed 20 days (Twitcher) or 3 months after the injection (MLD), evaluating efficiency of transduction (vector copy number by qPCR, immunoreactivity for the Myc peptide) and enzymatic activity (X-gal staining, GALC and ARSA assays) (Lattanzi *et al*, 2010) in CNS and non-CNS tissues. Age-matched untreated mutant and WT littermates were used as controls. All the animals used in the study were housed and bred in the animal facility of the San Raffaele Scientific Institute.

### **In vitro studies**

Human fibroblasts derived from Krabbe disease-affected patients were obtained from the "Cell line and DNA Biobank from patients affected by Genetic Diseases", Istituto Gaslini, Genova, Italy. Neural stem cells from Twitcher mice were derived and cultured as previously described (Neri *et al*, 2011). Human Krabbe fibroblasts and Twitcher NSCs were transduced overnight with LV.hGALC at different MOI (from 10 to 100). Cells underwent three subculturing passages before being plated on matrigel-coated glass coverslips (30.000 cells/cm<sup>2</sup>) and assessed for GALC activity by X-Gal staining (Neri *et al*, 2011). Untransduced cells from sister cultures were used as negative controls.

### **Surgical and post-surgical monitoring.**

*LV.GFP and LV.hARSA-injected NHP.* Surgical monitoring consisted of ECG, digital pulse oximetry, non-invasive blood pressure monitoring, heart rate and respiratory rate. Cage side observations were performed throughout the study to evaluate changes in general health, appearance, appetite and behavior: daily check of the animals was performed directly and using video monitoring. Any change in behavior was documented in the animal's clinical record. Neurobehavioral assessment was performed in LV.hARSA-injected animals prior to the implant surgery, 7-days after surgery and at 2-week intervals until the time of euthanasia. Features evaluated included the examination of the wound site, feeding, vomiting, menace, pupil size, gait and posture. Body weight assessment was performed on the day of implant surgery, and twice a week until the time of euthanasia.

*LV.hGALC-injected NHP.* Surgical monitoring consisted in ECG, digital pulse oximetry, non-invasive blood pressure monitoring, heart rate, end tidal CO<sub>2</sub>, and respiratory rate (Surgivet, Advisor Vital Signs Monitor). Body weight has been evaluated prior to infusion then weekly throughout study. Cage-side observations and neurological assessment have been performed prior to infusion and weekly after infusion until

necropsy. Neuromotor and behavioral assessments have been performed through the use of standardized behavioral profiles and clinical rating scales specifically designed for use with nonhuman primates. The behavioral staff at the TNPRC has used these profiles in rhesus monkeys for many years and is experienced in administering and interpreting them.

Modified Infant Neurobehavioral Assessment Scale (NBAS). This test is adapted for nonhuman primates from the Brazelton Neonatal Behavioral Assessment Scales used with humans (Brazelton, 1973). This test is valid for infants during the first four weeks of life. The scale consists of a 20-minute battery of tests that assess an infant's motor functioning, temperament, and interactive skills (Champoux *et al*, 2002a; Champoux *et al*, 2002b; Champoux *et al*, 1997). The 42 test items include numerous measurements that correspond to the typical course and manifestation of Krabbe disease, including visual orientation, state control, motor maturity, activity, reflexes and responses, fine and gross motor skills and strength, and temperamental items such as vocalization, self-quieting abilities, fearfulness, and distress. Scores are lumped into four categories for analysis: orientation, control, motor maturity, and activity. Prior research has found no sex differences in these measures so data from both males and females were included. Infants were evaluated using this scale at approximately 7 days, 14 days, and 28 days after birth. Composite scores, as well as individual items, were recorded for the 2 study animals (JT02 = Krabbe affected; JV02 = normal) as well as historical data collected on genetically normal animals and untreated, Krabbe-affected infants.

Modified Bayley scales of infant development. This test, originally developed for use with human infants (Bayley, 2000), has been modified for nonhuman primates between the ages of two months to one year (Champoux *et al*, 1994). This 10-minute test consists of 15 separate variables that are collapsed to three scores for analysis (problem-solving, motor abilities, and temperament). Beginning at two months of age, infants were evaluated monthly using this scale. For the study animals, scores were reported as pre-surgery and post-surgery. Historical data from animals of similar genetic status and age were collected and presented as means plus one standard deviation.

### **Magnetic Resonance Imaging**

Magnetic Resonance Imaging (MRI) was performed pre-operatively (to determine surgical trajectories) and post-surgery (to assess specificity of injection, distribution of viral suspension and potential adverse events, i.e. hemorrhagia, edema). Animals were sedated in the surgery room with ketamine, a venous line was established using a catheter positioned in the saphenous vein. Animals were anesthetized using liquid anaesthesia ketamine (5-10 mg/kg) + propofol (2-6 mg/kg), placed in a stereotactic MRI compatible frame, transported to the MRI room and positioned in the scanner for the pre-operative MRI. The respiratory rate was continuously monitored during scanning (SA Instruments Inc., Stony Brook, NY, USA) and body temperature were maintained around 37°C using heated airflow. Total scan time for the pre-operative MRI was approximately 30 minutes. Upon

completion of the scan animals were immediately transferred to the operating room for the cranial implant procedure. After LV injection, animals were transferred back in imaging zone for post-injection MRI.

MRI acquisitions were performed on a whole-body horizontal 7T Agilent scanner (Palo Alto, CA, USA), using a surface coil for transmission and reception (RAPID Biomedical GmbH, Rimpar, Germany). T2-weighted images were acquired using a high-resolution 2D fast spin-echo sequence ( $225 \times 225 \mu\text{m}^2$  in-plane resolution, and 1 mm slice thickness, 40 slices), with echo time TE/ repetition time TR=20/4750 ms, 5 echoes, effective TE=40 ms and acquisition time Tacq=16 min. Image analysis was performed using home made software BrainVISA (CEA, Orsay, France). LV volumes were measured using T2-weighted images. Both brain and injected volumes were manually segmented and reconstructed for 3D visualization.

### **Tissue collection and processing**

Cerebral spinal fluid and blood samples were collected from each animal prior to surgery and at the time of euthanasia under ketamine/xylazine anesthesia.

At the day of euthanasia animals underwent deep anesthesia using Pentobarbital and cardiac perfusion with ice-cold PBS (600 ml per animal). Whole brain, cervical spinal cord, sciatic nerves, spleen, liver, gonads were collected.

For LV.GFP and LV.hARSA-injected NHP the brain was cut in 6 mm-thick slices using an adjustable brain matrix, obtaining 9-10 slices/brain (approximately 6 mm thick). Each slice was divided along the midline. Brain slices 2-7 were cut in 12 approximately equal specimens per hemisphere (16 blocks for NHP P1) and remaining slices were cut in squares of approx. 10x10 mm. A picture of each slice with its subdivision pattern was taken. Collected specimens were named using following scheme: number of slice (1 to 9-10), followed by right or left hemisphere (R or L) and by specimen number. Squares with numbers 3 (entire), 4 (half), 8 (half) and 10 (half) or 12 (half) of each hemisphere as well as samples of cervical spinal cord, left and right sciatic nerve, liver, spleen and gonads were fixed in PFA 4% and processed for histological analysis. Remaining brain samples were individually frozen in suitable cryoboxes on dry ice. An average of 102 blocks/hemisphere were retrieved (range 95-110) with an average volume of 0.32 cm<sup>3</sup>/block.

For JV02 and JT02, the brain and cervical spinal cord have been removed and sectioned coronally into 3 mm-thick coronal sections. Slices have been divided along the midline in order to separate the injected from the non-injected hemispheres and blocks were cut following a 2 x 3 grid whenever possible. Blocks from **odd** slices have been immediately frozen in dry ice and stored for biochemical and molecular analysis. Blocks from **even** slices have been immersed in fixative (4% PFA) and processed routinely, embedded in paraffin or freezing compound (for storage at -80°C) to be used for histology (H&E), immunohistochemistry or immunofluorescence.

For all animals, cervical spinal cord was cut in 3-4 blocks that were frozen or fixed as described above.

### **Quantification of VCN**

VCN in murine samples was quantified as previously described (Lattanzi *et al*, 2010). To quantify the VCN in NHP samples, standard curves were performed by using sequential dilutions of genomic DNA (100 ng to 0.8 ng) extracted from a human CEM cell clone carrying 1 LV integrated copy (CEM clone #25), previously validated by Southern blot analysis. To validate the accuracy of LV/TAF7-based system, sample of genomic DNA extracted from a human CEM cell clone carrying 6 LV integrated copies (CEM clone #37), previously validated by Southern blot analysis, were included in each run. Indeed, Taqman analysis, based on LV and TAF7 primers and probes and CEM25-based standard curve, detected ~5.8 VCN in CEM37 clone. Reactions were carried out in a total volume of 12.5 $\mu$ l, in a ViiA™ 7 Real-Time PCR System (Life Technologies-Applied Biosystems, Carlsbad, CA, USA).

The following criteria were applied to validate TaqMan experiments: i) standard curve: slope between 3.4 and 3.6,  $r^2 > 0.95$ ; ii) CT of UT NHP sample  $> 37$ ; iii) CEM37 VCN =  $5.5 \pm 1.06$ . Only NHP samples with TAF7 probe CT within 22-26 were considered in the analyses. NHP samples with LV probe CT  $> 37$  were considered with an undetectable VCN. Data were obtained by n=2 experiments performed in duplicate. Samples with intra-experiment CT variability  $> CT=2$  (for TAF7 or LV) are excluded from the analyses. Samples with inter-experiment VCN variability  $> 50\%$  are analyzed at least in n=3 experiments.

The VCN was calculated as follows: (ng LV/ng TAF7)  $\times$  (number of LV integrations in the standard curve).

### **Western blot analyses**

Tissues were homogenized with T10 basic ULTRA-TURRAX®, IKA in 500  $\mu$  l of lysis buffer [PBS 1X, 50 mM TRIS HCl PH 7.4-7.5, 150 mM NaCl, 0,5% DOC, 0,1% SDS, 2mM EDTA, 1% Triton, protease inhibitor 7X (EDTA-Free Protease Inhibitor Cocktail, Roche) and phosphatase inhibitor 10X (PhosphoSTOP, Roche)], subjected to 3 rounds of sonication (three cycles of 15 pulses, Amplitude 0.7, 0.5 seconds oscillation) and to 3 freeze/thaw cycles (3' each). Lysates were centrifuged at 12.000  $\times g$  for 15' at 4°C, and supernatants were used as protein extracts for western blot analysis. We measured protein content using the Bradford Protein Assay kit with bovine serum albumin (BSA) as the reference standard. After boiling for 5 min in loading buffer (30% glycerol, 5% SDS, 9.25% Dithiothreitol, 1  $\mu$  l of Bromophenol Blue, Tris-HCl 0.5 M, pH 6.8) samples containing 20-80  $\mu$  g protein were separated through a 12% acrylamide gel SDS-PAGE electrophoresis. The transfer was performed at 400 mA for 1 hour and 30 minutes at 4°C. The PDVF membranes were then incubated in blocking solution of TBS-Tween 0.1% (Tris-Buffered Saline + Tween 20; TBS-T; Sigma Aldrich)+ 5% milk for 1 hour, and stained o/n at 4°C with primary antibodies diluted in TBS-Tween+3% milk solution. After 3 washes (10 minutes each), antibody staining was revealed using HRP-conjugated goat anti-rabbit (1:10.000; Chemicon) for 1 hour at RT in TBS-T+3% milk solution. Blots were developed with ECL system (Immobilon Western, Millipore) and were exposed to x-ray films (different exposure times according to the intensity of signals). Membranes were stripped for 15' with Stripping Buffer (Thermo Scientific), blocked and incubated with goat anti- $\beta$ -actin antibody (1:10.000; Santa Cruz Biotechnology) and revealed with HRP-conjugated

chicken anti-goat (1:20.000; Santa Cruz Biotechnology). Primary antibodies: rabbit anti-GFP antibody (1:2.000; Molecular Probes); mouse anti-GFAP (1:100.000; Millipore), rabbit anti-Iba1 (1:2.000; Wako). The 27 KDa bands revealed using the anti-GFP antibody were quantified by means of ImageJ software and the values (in pixels) obtained were normalized on those of the corresponding b-actin band.

### **Histopathology**

Post-fixed samples were processed into paraffin blocks. All the blocks from brain, spleen, gonads, liver, sciatic nerve and spinal cord were sectioned and stained in HE. This severity score in was attributed according to the size and number of observed lesions. Grade 0: within physiological limits. Grade 1: Minimal pathology generally affecting less than 1% of the tissue examined from a specific anatomic location. Grade 2: Mild pathology generally affecting 1-10% of the tissue examined from a specific anatomic location. Grade 3: Moderate pathology generally affecting 11-50% of the tissue examined from a specific anatomic location. Grade 4: Severe pathology generally with an overwhelming effect that involved more than 50% of the morphologic structure.

### **Primary and secondary antibodies**

Immunofluorescence: mouse anti-GFAP (1:200; MAB3402, Chemicon-Millipore or C9205, Sigma Aldrich), rabbit anti-GFAP (1:100; ZO334, Dako), mouse anti-NeuN (1:100; MAB377, Chemicon), rabbit anti-Iba1 (1:200; 019-19741 Wako Chemicals), chicken anti-GFP (1:100; AB-13970b Abcam), mouse anti-CNPase (1:100; MAB326R Chemicon), mouse anti-APC (1:100; OP80 Calbiochem), mouse anti-ARSA (1:100; H00000410-B01P, Abnova); rabbit anti-ARSA (1:100; 19061-1-AP ProteinTech), mouse anti-GALC (1:100; H00002851-M01 Abnova), rabbit anti-GALC (1:100; H00002581-D01P, Abnova), rabbit anti-Myc tag (1:50 on tissues; 1:300 on cells; ab9106 Abcam), rabbit anti-S100 $\beta$  (1:1.000; S-2644 Sigma Aldrich). Secondary antibodies: Alexa 488-, Alexa 546-, Alexa 633- (Molecular Probes) conjugated anti-rabbit, anti-mouse, anti-rat, anti-chicken antibodies (1:1.000).

Images were taken using Leica Confocal SP2 microscope and Perkin Elmer UltraVIEW ERS Spinning Disk Confocal microscope. Images were imported into Adobe Photoshop CS4 (USA) and adjusted for brightness and contrast.

Immunohistochemistry: mouse monoclonal anti-CD3 (dilution: 1:400; Novocastra™), mouse monoclonal anti-CD20 (dilution: 1:800; Novocastra™) and mouse monoclonal anti-CD11c (1:100; Novocastra™), polyclonal anti-ARSA antibody (1:150; AF2485, R&D system)

### **ELISA assay**

In each ELISA experiment (excluding ELISA assay to detect anti-hARSA antibodies) sera of 11 week-old BALB/c mice immunized by systemic injection of LV.ET.GFP.miR-142 (Annoni *et al*, 2009) were used as

positive controls (dilution of sera from  $1:2 \times 10^2$  to  $1:2 \times 10^4$ ). Sera of UT mice and pre-surgery NHP sera were used as negative controls. Standard curves based on serial dilutions (from 0.5  $\mu\text{g/ml}$  to 0.03  $\mu\text{g/ml}$ ) of mouse IgG2a (BD Pharmingen) and Monkey IgG Isotype Control (Novus Biological) were used to calculate the antibody titers in mouse and NHP sera. The threshold was set as: (mean titer measured in pre-surgery NHP sera) + [(standard deviations)  $\times$  3]. Experiments ( $n=3$ ) were performed in triplicates. Microplates (96-well) were coated with different antigens diluted in 1 M carbonate buffer (pH 9.5): i) recombinant-GFP, 0.3  $\mu\text{g/well}$  (Vector Laboratories); ii) protein extracts of LV vector encoding for an unrelated protein (Factor IX), 2  $\mu\text{g/well}$ ; iii) protein extracts of 293T cells transfected with a plasmid over-expressing the p24 viral protein, 2  $\mu\text{g/well}$ ; iv) protein extracts of 293T cells transfected with a plasmid over-expressing the VSV-G viral protein, 2  $\mu\text{g/well}$ . After three washes in PBS + 0.05% Tween-20, samples were incubated with blocking buffer (PBS + 0.05% Tween-20 + 1% ovalbumin) for 2 h at RT in the dark. Serial dilutions in PBS + 0.05% Tween-20 (from 1:2 to  $1:2 \times 10^4$ ) of pre- and post-surgery sera of LV-injected NHP were added for 2 h at RT in the dark. Following four washes, anti-GFP, anti-LV, anti-p24 or anti-VSV-G were detected by adding 100  $\mu\text{l/well}$  of diluted (1:2,000) peroxidase-conjugated goat anti-monkey IgA/IgG/IgM H/L chains (Novus Biologicals) for 1h at RT in the dark. After four washes, plates were reacted with OPD (Sigma–Aldrich) and  $\text{H}_2\text{O}_2$  (final concentration 3%). The reaction was stopped by adding 50  $\mu\text{l/well}$  of 1M sulfuric acid. Plates were read using an ELISA reader (VERSAmax Molecular Devices, Sunnyvale, CA, USA), and values are expressed as optical density (OD;  $\lambda$  492 nm).

ARSA protein (concentration: 0.05, 1, 2 mU) purified by DEAE-cellulose chromatography was incubated in 96-well microplates (MaxiSorp™, Nunc) in coating buffer ( $\text{NaHCO}_3$  0.1M pH 8.6) overnight at 4°C, after which LV.hARSA-injected NHP sera (dilution 1:2) were added and incubated overnight at 4°C. Following extensive washes with TBS+0.05% Tween-20, each well was exposed to anti-human peroxidase-conjugated secondary antibody (Sigma-Aldrich) and, subsequently, reacted with T0440 3,3',5,5'-Tetramethylbenzidine (Sigma-Aldrich). Finally, absorbance was measured at  $\lambda$  450 nm in Microplate Reader (GDV DV-990BV6). As quantification reference, a calibration curve was obtained by coating a serial dilution (from 0.016 $\mu\text{g/ml}$  to 2 $\mu\text{g/ml}$ ) of the anti-human peroxidase-conjugated secondary antibody stained with T0440 3,3',5,5'-Tetramethylbenzidine as described above.

#### **p24 enzyme-linked immunosorbent assay**

Upon protein lysis with 5% Triton X-100, serial dilutions of pre- and post-surgery sera were plated in triplicate in microplate wells coated with a mouse monoclonal antibody to the HIV-1 capsid protein p24. The captured antigen was then complexed with biotinylated polyclonal antibody to HIV-1 p24, followed by a streptavidin-HRP (horseradish peroxidase) conjugate. The resulting complex was detected by incubation with ortho-phenylenediamine-HCl, which produces a yellow color that is directly proportional to the amount of HIV-1 p24

captured. Absorbance was determined using a microplate reader (Versa Max, Molecular Devices) ( $\lambda$  490 nm) and p24 amount was calculated by using an HIV-1 p24 antigen standard curve. Experiments (n=3) were performed in triplicates.



**Appendix Supplementary figures**

**Fig. S1**

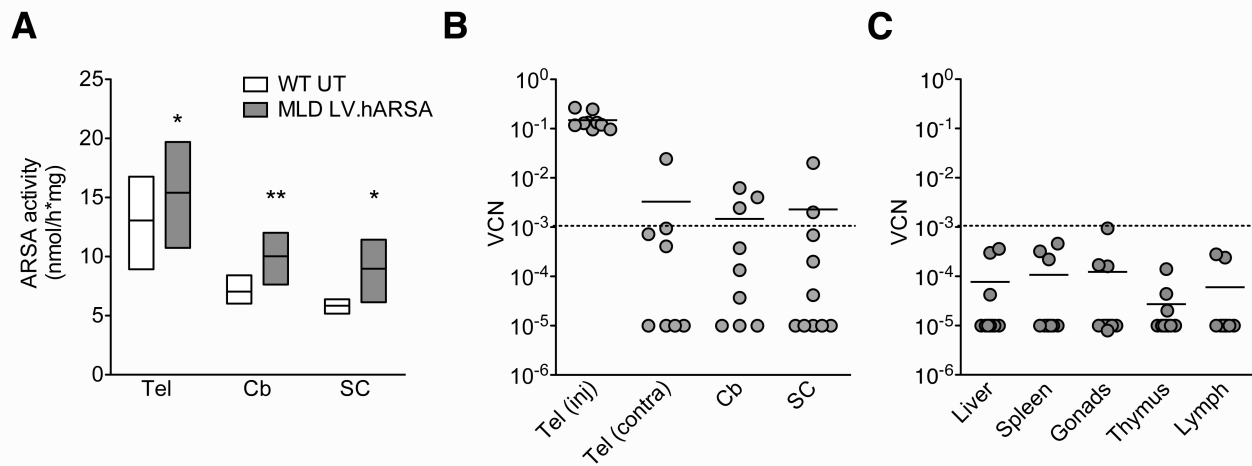

**Appendix Figure S1. Intracerebral injection of LV.hARSA in MLD mice.** LV.ARSA ( $2 \times 10^6$  TU/ $2 \mu$ l) was unilaterally injected in the external capsule (EC) of PND21 MLD mice. Mice were evaluated 3 months after injection for ARSA activity in CNS tissues and for integrated LV genome in CNS and non-CNS tissues. **(A)** LV.hARSA-injected MLD mice show supraphysiological levels of ARSA activity (assessed in age-matched WT littermates) in the telencephalon (Tel), cerebellum (Cb) and spinal cord. Age-matched untreated MLD mice show undetectable ARSA activity. Data are represented as floating bars (min to max, line at mean).  $n=3-6$  animals/group.  $*p=0.04$  (Tel),  $p=0.019$  (SC),  $**p=0.0043$  versus WT UT, unpaired Student t-test. **(B)** Integrated LV genome is detected in the injected brain region (Tel inj) and, to a minor extent, in the contralateral hemisphere (Tel contra), Cb and SC. **(C)** VCN values below the threshold of detectability are found in liver, spleen, gonads, thymus and lymphnodes (lymph) of all injected mice. Each dot in (B) and (C) corresponds to one animal.

Fig. S2

A

|      | DAYS POST-SURGERY |   |   |   |   |   |   |   |    |    |    |    |    |    |    |    |    |    |    |    |    |    |   |
|------|-------------------|---|---|---|---|---|---|---|----|----|----|----|----|----|----|----|----|----|----|----|----|----|---|
| NHP  | 1                 | 2 | 3 | 4 | 5 | 6 | 7 | 8 | 11 | 12 | 13 | 14 | 15 | 20 | 21 | 22 | 27 | 41 | 50 | 61 | 75 | 90 |   |
| S1.1 |                   |   |   |   |   | ■ |   |   |    |    |    |    |    |    |    |    |    |    |    |    |    | ■  | ■ |
| S1.2 |                   |   | ■ | ■ |   |   |   |   |    |    |    | ■  | ■  | ■  | ■  | ■  | ■  |    |    |    |    |    |   |
| S1.3 |                   |   |   |   |   |   |   |   |    |    |    |    |    | ■  |    |    |    |    |    |    |    |    |   |
| S2.1 |                   |   |   |   |   |   |   |   |    |    |    |    |    |    |    |    |    |    |    |    |    |    |   |
| S2.2 |                   |   |   |   |   |   |   |   |    |    |    |    | ■  |    |    |    |    |    |    |    |    |    |   |
| S2.3 |                   |   |   |   | ■ |   | ■ |   |    |    |    |    |    |    |    |    |    |    |    |    |    |    |   |

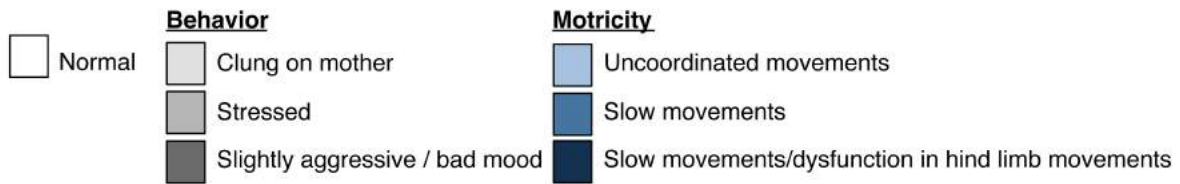

B

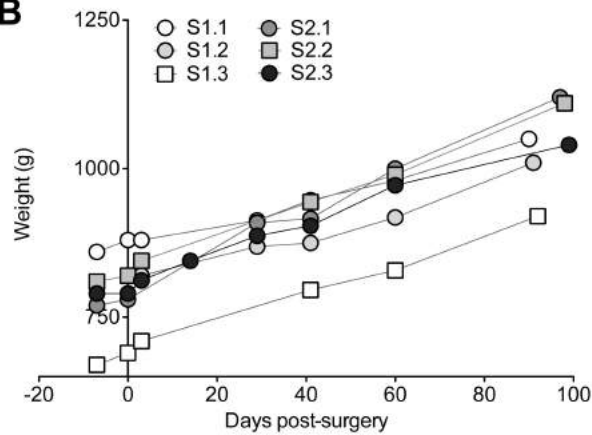

C

|      |       | Pre-surgery |      |      |               |              | Post-surgery |      |      |      |      |      |      |      |               |              | P value  |
|------|-------|-------------|------|------|---------------|--------------|--------------|------|------|------|------|------|------|------|---------------|--------------|----------|
|      |       | S1.1        | S2.2 | U14  | Mean          | SEM          | P1           | P2   | S1.1 | S1.2 | S2.1 | S1.3 | S2.2 | S2.3 | Mean          | SEM          |          |
| ALB  | g/dL  | 4.1         | 3.7  | 4    | <b>3.9</b>    | <b>0.1</b>   | 3.3          | 4.6  | 3.6  | 4    | 3.4  | 4.4  | 3.6  | 3.7  | <b>3.8</b>    | <b>0.1</b>   | P > 0.05 |
| ALP  | U/L   | 393         | 244  | 845  | <b>494.0</b>  | <b>180.7</b> | 343          | 235  | 400  | 552  | 135  | 475  | 448  | 244  | <b>354.0</b>  | <b>49.8</b>  | P > 0.05 |
| ALT  | U/L   | 36          | 36   | 21   | <b>31.0</b>   | <b>5.0</b>   | 18           | 34   | 23   | 17   | 16   | 19   | 16   | 36   | <b>22.3</b>   | <b>2.8</b>   | P > 0.05 |
| AST  | U/L   | 57          | 59   | 52   | <b>56.0</b>   | <b>2.1</b>   | 62           | 70   | 112  | 40   | 36   | 79   | 65   | 59   | <b>65.3</b>   | <b>8.3</b>   | P > 0.05 |
| CK   | U/L   | 1153        | 744  | 912  | <b>936.3</b>  | <b>118.7</b> | 1048         | 2108 | 1207 | 573  | 431  | 968  | 754  | 744  | <b>979.1</b>  | <b>184.3</b> | P > 0.05 |
| GLU  | mg/dl | 225         | 268  | 88   | <b>193.6</b>  | <b>54.3</b>  | 76           | 100  | 180  | 164  | 109  | 203  | 215  | 268  | <b>164.3</b>  | <b>23.1</b>  | P > 0.05 |
| LDH  | U/L   | 1642        | 1164 | 1336 | <b>1380.6</b> | <b>139.8</b> | 1261         | 1256 | 1167 | 755  | 871  | 1048 | 830  | 1164 | <b>1044.0</b> | <b>70.8</b>  | P > 0.05 |
| TRIG | mg/dL | 75          | 53   | 63   | <b>63.6</b>   | <b>6.3</b>   | 45           | 55   | 77   | 32   | 39   | 48   | 38   | 53   | <b>48.3</b>   | <b>4.9</b>   | P > 0.05 |

Appendix Figure S2. Post-surgery follow-up of LV.hARSA-injected NHP. (A) Daily check of the animals was performed directly and using video monitoring to evaluate changes in general health, appearance, appetite and behavior. Neurobehavioral assessments were performed prior to surgery (day 1) and continued until the end of experiment (day 90-96). Features evaluated included the examination of the wound site, feeding, vomiting,

menace, pupil size, gait and posture. **(B)** Body weight assessment was performed before surgery (day -7), at the day of surgery and twice a week until the end of experiment. **(C)** Serum chemistry was performed on samples collected pre-surgery and at the end of experiment (post-surgery). Pre-surgery serum collected from U14 NHP was included in the analysis. Data are expressed as mean  $\pm$  SEM and analyzed by Two-way ANOVA and Bonferroni post-test (variables: analytes and treatment).  $p > 0.05$  for all analytes. ALB, albumin; ALP, alkaline phosphatase; ALT, alanine amino transferase; AST, aspartate amino transferase; CK, creatine kinase, GLU, glucose; LDH, lactic dehydrogenase; TRIG, triglycerides.

Fig. S3

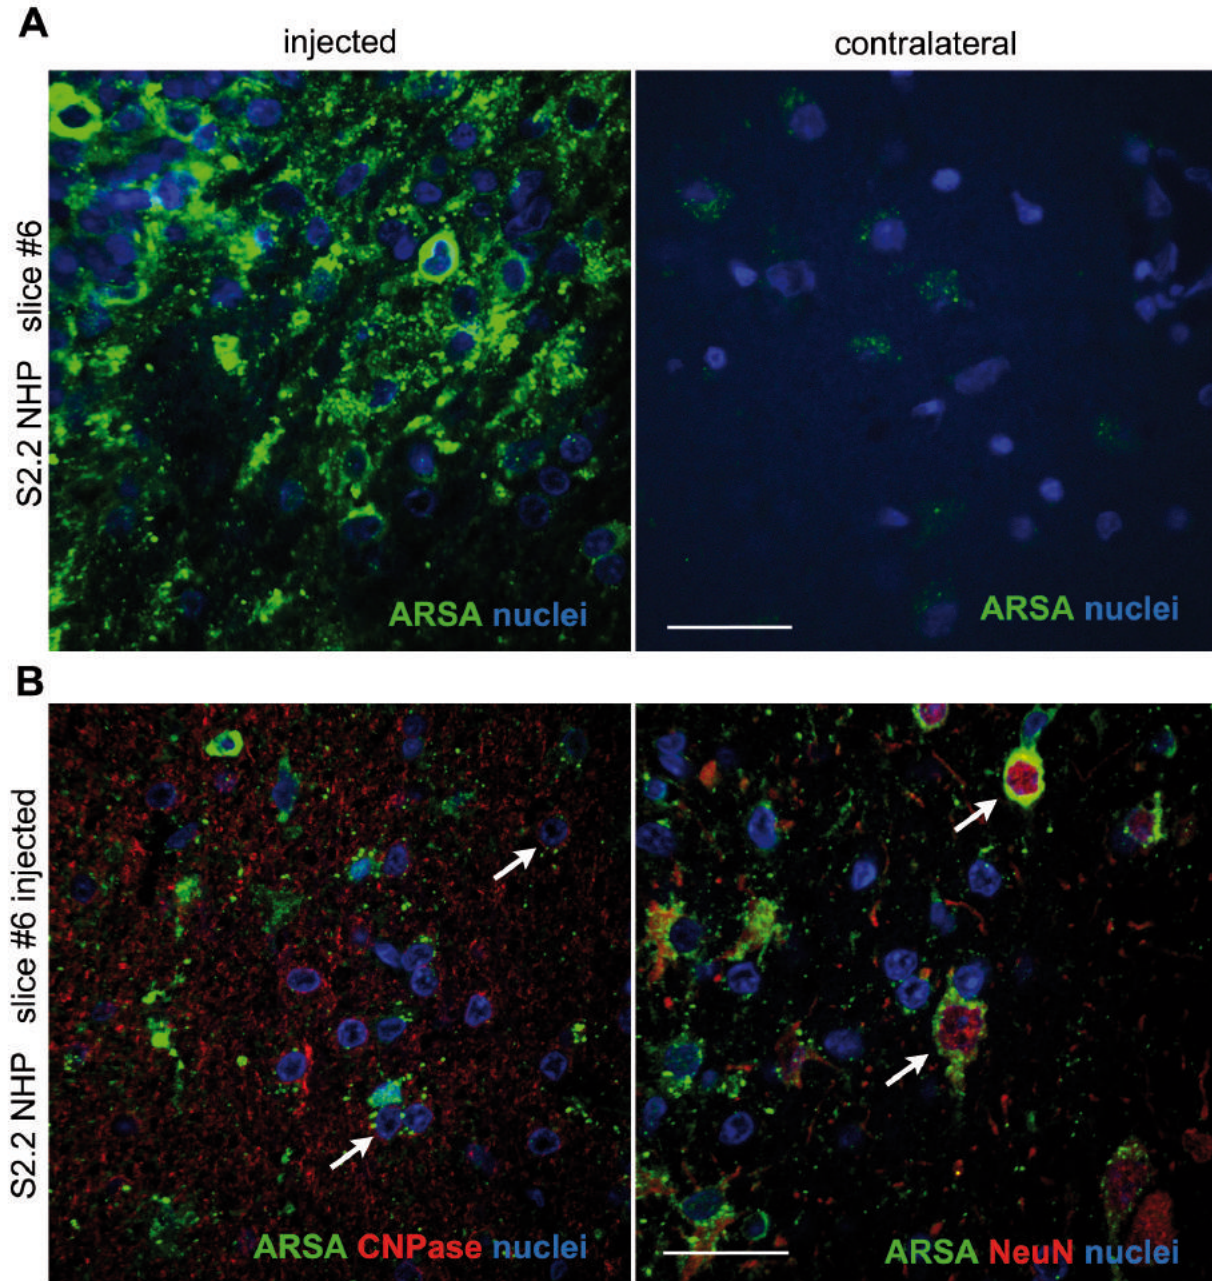

**Appendix Figure S3. ARSA expression in neurons and glial cells in the injected and contralateral hemisphere.** (A) Representative confocal images showing numerous ARSA-overexpressing cells close to the posterior injection site of S2.2 NHP (slice #6) and few cells showing weak ARSA immunoreactivity in the matched area of the contralateral hemisphere (putative cross-corrected cells). (B) Representative confocal images showing oligodendrocytes (CNPase, red) and neurons (NeuN, red) expressing

ARSA (green) close to the posterior injection site of S2.2 NHP. Arrows indicate co-localization of IF signals. Note the granular perinuclear ARSA staining, likely representing protein localized in the Golgi/lysosomal vesicles. In all pictures nuclei are counterstained with ToPro (blue). Scale bars: 60 $\mu$ m.

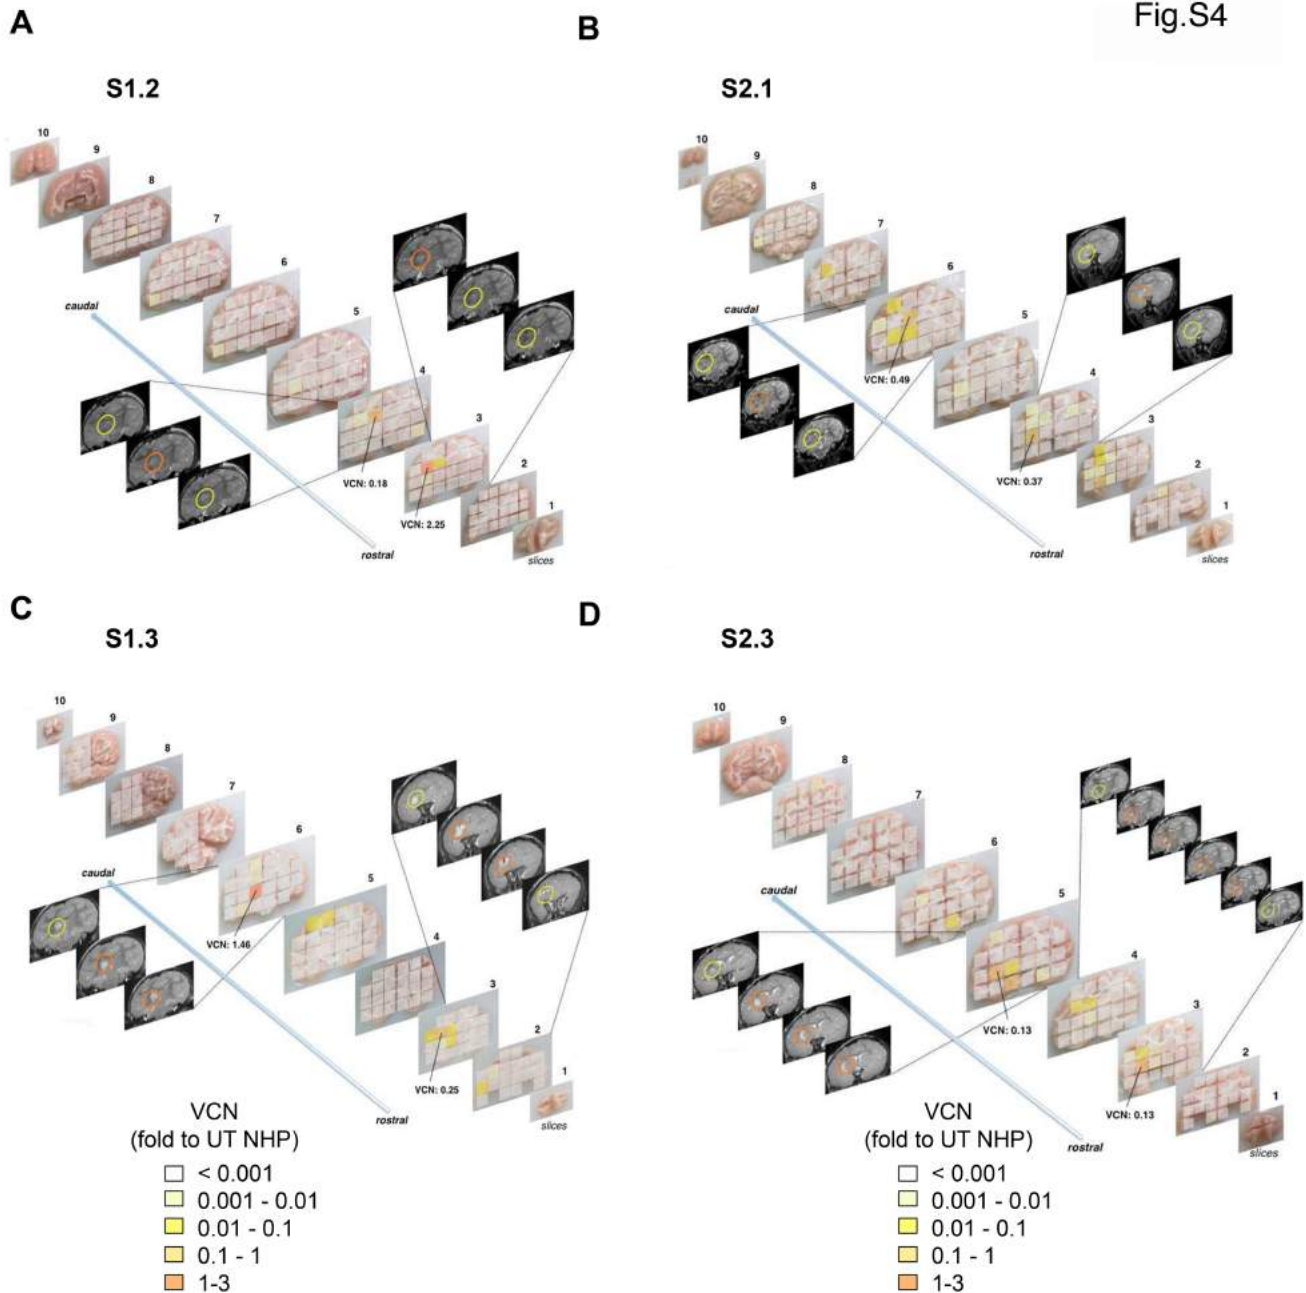

**Appendix Figure S4. VCN distribution in LV.hARSA-injected NHP.** (A-D) Vector copy number (VCN) cartography shows the distribution of integrated LV genome in the different blocks of brain slices 1 to 10 (rostral to caudal), assessed by qPCR analyses, of animals in study group 1 (S1.2, S1.3; **A**, **B**) and study group 2 (S2.1, S2.3; **C**, **D**). The color code indicates increasing VCN (lower threshold:  $VCN < 0.001$ , corresponding to  $CT > 37$ ). The highest VCN is found in close correspondence to the injection sites, as confirmed by comparison with post-surgery MR images (yellow and orange circles indicate the presence of viral suspension around the injection sites, assessed 30-60 min after injection).

Fig. S5

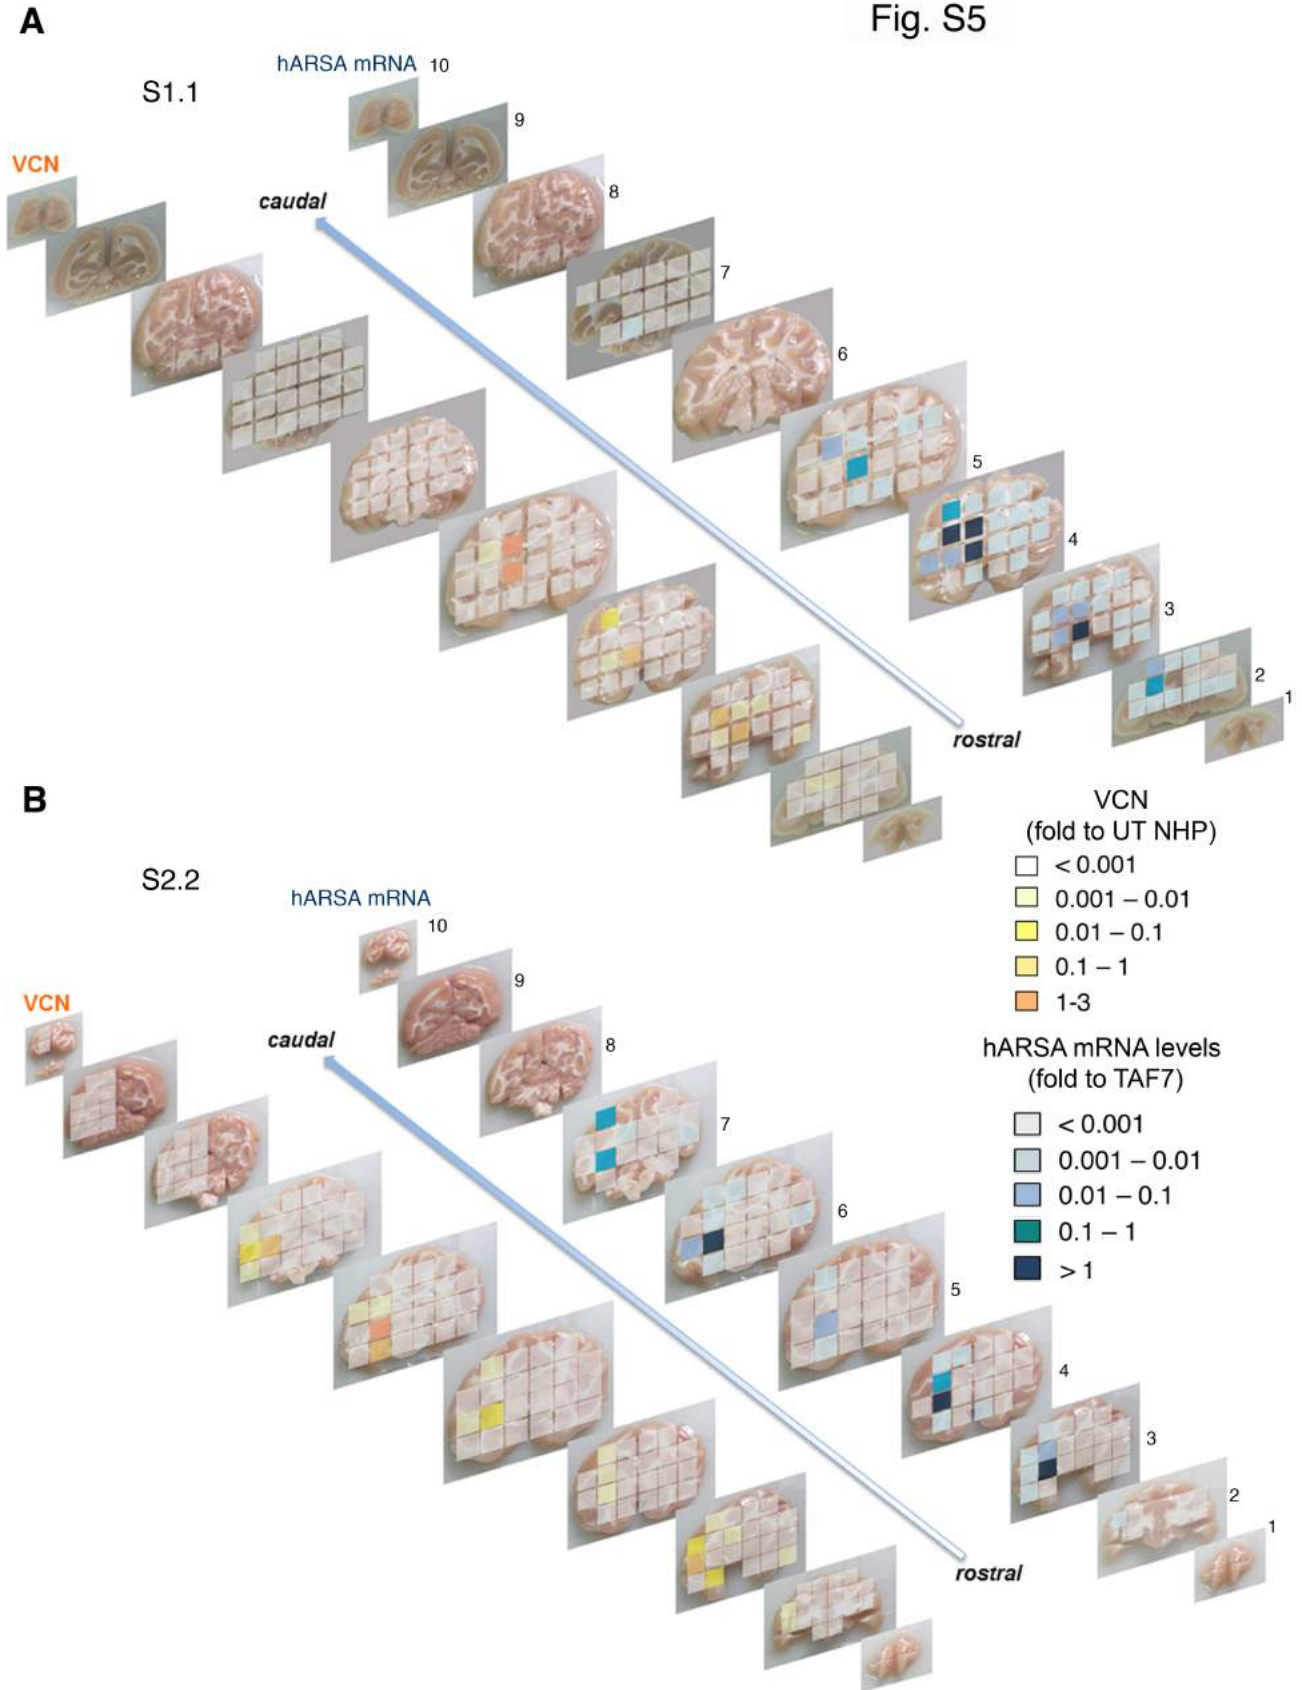

**Appendix Figure S5. Expression of transgenic hARSA.** Cartographies showing transgenic hARSA mRNA expression (quantified by using primers and probe annealing the wpre element in the 3'UTR of the LV.hARSA

cassette) in the brain of S1.1 NHP (**A**) and S2.2 NHP (**B**) in a side-by-side comparison with VCN distribution. ARSA mRNA levels are expressed as fold to TAF7 (normalizer). Grading scale of colors ranges from white (<0.001, corresponding to CT>37; undetectable expression) to dark blue (> 1 fold; robust expression). The volume of injected hemisphere with detectable transgenic hARSA mRNA was 28.6±0.9% and 30±7.3% (mean±SEM; n=3) of the total hemisphere volume in NHP of study group 1 and study group 2, respectively.



Fig. S6

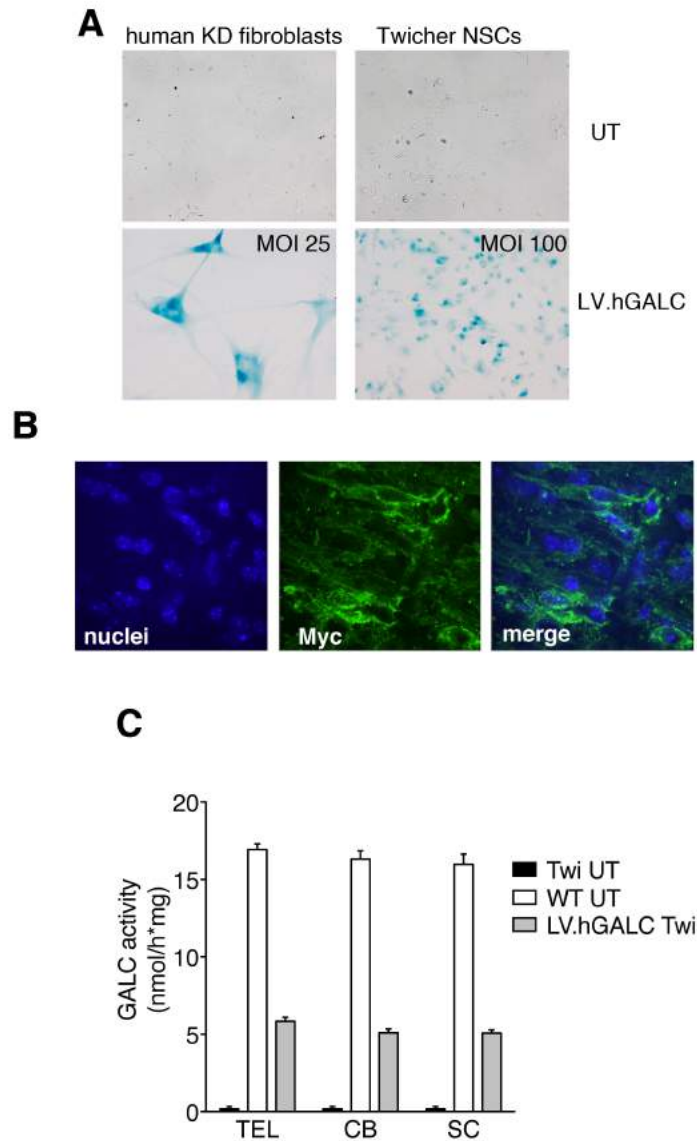

**Appendix Figure S6. Validation of LV.hGALC in vitro and in a Krabbe murine model.** (A) GALC activity assessed by colorimetric X-GAL staining in human fibroblasts from a Krabbe-affected patient and in neural stem cells (NSCs) from GALC-deficient Twitcher mice transduced with LV.hGALC at MOI 25 and MOI 100, respectively. UT, untreated. (B) Cells expressing GALC (identified by indirect IF using anti-Myc antibody) in the brain of Twitcher mice injected with LV.hGALC. Nuclei counterstained with ToPro. (C) GALC activity measured in the telencephalon (TEL), cerebellum (CB) and spinal cord tissues (SC) of Twitcher injected with LV.hGALC in the external capsule at PND2 and analyzed at PND40. Age-matched untreated (UT) WT and Twitcher mice were used as controls. Data are the mean  $\pm$  SEM; n=6-10 mice/group.

Fig. S7

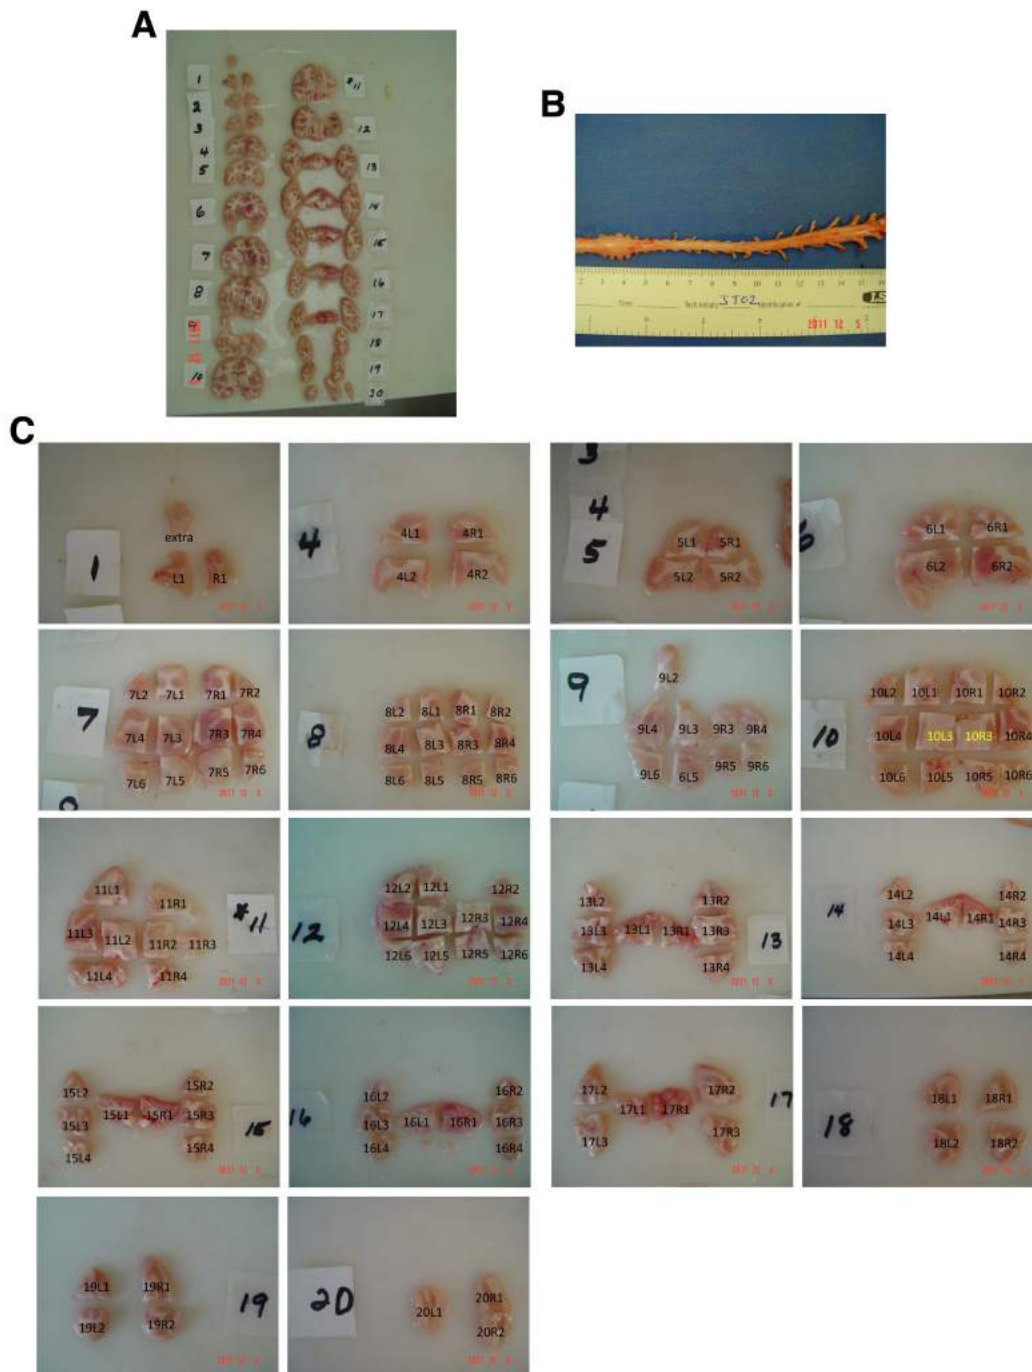

**Appendix Figure S7. Necropsy and tissue collection of Krabbe affected NHP.** At the end of experiment animals underwent deep anesthesia and were perfused with ice-cold PBS. **(A)** The whole brain was cut in 3 mm-thick slices, obtaining 19-21 slices/brain. **(B)** The cervical spinal cord was cut in 4 blocks. **(c)** Each brain slice was divided along the midline and each part subdivided in blocks. Yellow text in slice #10 indicates the block including the thalamic region in the injected hemisphere (right) and its matched block in the contralateral hemisphere (left).

## Appendix Supplementary Tables

**Appendix Table S1. LV.GFP and LV.ARSA-injected NHP.** The table shows the ID (original and after recoding based on assignments to experimental groups), the gender, the age at surgery and at sacrifice of the nine juvenile *Macaca Fascicularis* used in the study. The asterisk indicates the animal that died from respiratory arrest (possibly due to an overdose of anesthetic) before surgery. This animal was not recoded and was perfused with saline, serum and brain tissues were collected, frozen and used as control untreated samples in several analysis.

| <b>Original ID</b> | <b>Recoded ID</b> | <b>Gender</b> | <b>Age at surgery (days)</b> | <b>Age at the end of experiment (days)</b> |
|--------------------|-------------------|---------------|------------------------------|--------------------------------------------|
| U7                 | P1                | male          | 69                           | 104                                        |
| U8                 | P2                | male          | 67                           | 103                                        |
| U13                | S1.1              | male          | 99                           | 191                                        |
| U14*               | na                | male          | 99                           | 99                                         |
| U15                | S1.2              | male          | 99                           | 192                                        |
| U16                | S2.1              | male          | 96                           | 194                                        |
| U17                | S1.3              | female        | 96                           | 190                                        |
| U18                | S2.2              | female        | 91                           | 190                                        |
| U19                | S2.3              | male          | 92                           | 192                                        |

**Appendix Table S2. Lentiviral vectors batches.** The table shows titer, infectivity and endotoxin compliance of lentiviral vectors used in this study.

| <b>Vectors</b> | <b>Titer<br/>(TU/ml)</b> | <b>Infectivity<br/>(TU/ng p24)</b> | <b>Endotoxin/TU<br/>(<math>\leq 1.25 \times 10^{-7}</math> EU/TU)</b> |
|----------------|--------------------------|------------------------------------|-----------------------------------------------------------------------|
| LV.hARSA       | $7.63 \times 10^8$       | $1.25 \times 10^5$                 | $2.57 \times 10^{-8}$                                                 |
| LV.GFP         | $7 \times 10^9$          | $4.66 \times 10^4$                 | nd                                                                    |
| LV.hGALC-myc   | $4.3 \times 10^9$        | $2.15 \times 10^4$                 | nd                                                                    |

**Appendix Table S3. CED parameters used for intracerebral infusion of LV suspension in normal NHP.**

The table reports the escalating infusion rate over time, the calculated and total infused volume (Vi) and the total time required for each injection site in animals of the pilot group and of the study groups.

**PILOT GROUP**

|                                                                            | Site 1<br>Anterior External capsule |               |             |      |                                                                          | Site 2<br>Thalamus  |               |             |      |           |
|----------------------------------------------------------------------------|-------------------------------------|---------------|-------------|------|--------------------------------------------------------------------------|---------------------|---------------|-------------|------|-----------|
|                                                                            | Infusion start time                 | rate (ul/min) | time (min.) | Vol. | Cum. Vol.                                                                | Infusion start time | rate (ul/min) | time (min.) | Vol. | Cum. Vol. |
| P1                                                                         | 11:34                               | 1             | 1           | 1    | 0                                                                        | 11:53               | 1             | 1           | 1    | 0         |
|                                                                            | 11:35                               | 2             | 1           | 2    | 1                                                                        | 11:54               | 2             | 1           | 2    | 1         |
|                                                                            | 11:36                               | 3             | 1           | 3    | 3                                                                        | 11:55               | 3             | 1           | 3    | 3         |
|                                                                            | 11:37                               | 4             | 1           | 4    | 6                                                                        | 11:56               | 4             | 1           | 4    | 6         |
|                                                                            | 11:38                               | 5             | 6           | 30   | 10                                                                       | 11:57               | 5             | 14          | 70   | 10        |
|                                                                            | 11:44                               | stop          | na          | na   | 40                                                                       | 12:11               | stop          | na          | na   | 80        |
| Total time: 10 min<br>Vi (calculated): 40 ul<br>Total Vi (pump): 0.0406 ml |                                     |               |             |      | Total time: 18 min<br>Vi (calculated): 80 ul<br>Total Vi (pump): 0.08 ml |                     |               |             |      |           |

|    | Site 1<br>Anterior External Capsule                                       |               |             |      |           | Site 2<br>Thalamus                                                        |               |             |      |           |
|----|---------------------------------------------------------------------------|---------------|-------------|------|-----------|---------------------------------------------------------------------------|---------------|-------------|------|-----------|
|    | Infusion start time                                                       | rate (ul/min) | time (min.) | Vol. | Cum. Vol. | Infusion start time                                                       | rate (ul/min) | time (min.) | Vol. | Cum. Vol. |
| P2 | 17:09                                                                     | 1             | 1           | 1    | 0         | 16:05                                                                     | 1             | 1           | 1    | 0         |
|    | 17:10                                                                     | 2             | 1           | 2    | 1         | 16:06                                                                     | 2             | 1           | 2    | 1         |
|    | 17:11                                                                     | 3             | 1           | 3    | 3         | 16:07                                                                     | 3             | 1           | 3    | 3         |
|    | 17:12                                                                     | 4             | 2           | 8    | 6         | 16:08                                                                     | 4             | 1           | 4    | 6         |
|    | 17:14                                                                     | 5             | 1           | 5    | 14        | 16:09                                                                     | 5             | 28          | 140  | 10        |
|    | 17:15                                                                     | 6             | 1           | 6    | 19        | 16:37                                                                     | stop          | na          | na   | 150       |
|    | 17:16                                                                     | 7             | 1           | 7    | 25        |                                                                           |               |             |      |           |
|    | 17:17                                                                     | 8             | 1           | 8    | 32        |                                                                           |               |             |      |           |
|    | 17:18                                                                     | 9             | 1           | 9    | 40        |                                                                           |               |             |      |           |
|    | 17:19                                                                     | 10            | 11          | 110  | 40        |                                                                           |               |             |      |           |
|    | 17:30                                                                     | stop          | na          | na   | 150       |                                                                           |               |             |      |           |
|    | Total time: 21 min<br>Vi (calculated): 150 ul<br>Total Vi (pump): 0.15 ml |               |             |      |           | Total time: 32 min<br>Vi (calculated): 150 ul<br>Total Vi (pump): 0.15 ml |               |             |      |           |

**STUDY GROUP 1**

|                                                                          | Site 1<br>Anterior External Capsule |               |             |      |                                                                          | Site 2<br>Thalamus  |               |             |      |           |
|--------------------------------------------------------------------------|-------------------------------------|---------------|-------------|------|--------------------------------------------------------------------------|---------------------|---------------|-------------|------|-----------|
|                                                                          | Infusion start time                 | rate (ul/min) | time (min.) | Vol. | Cum. Vol.                                                                | Infusion start time | rate (ul/min) | time (min.) | Vol. | Cum. Vol. |
|                                                                          | 11:10                               | 1             | 1           | 1    | 0                                                                        | 10:28               | 1             | 1           | 1    | 0         |
|                                                                          | 11:11                               | 2             | 1           | 2    | 1                                                                        | 10:29               | 2             | 1           | 2    | 1         |
|                                                                          | 11:12                               | 3             | 1           | 3    | 3                                                                        | 10:30               | 3             | 1           | 3    | 3         |
|                                                                          | 11:13                               | 4             | 1           | 4    | 6                                                                        | 10:31               | 4             | 1           | 4    | 6         |
|                                                                          | 11:14                               | 5             | 14          | 70   | 10                                                                       | 10:32               | 5             | 14          | 70   | 10        |
|                                                                          | 11:28                               | stop          | na          | na   | 80                                                                       | 10:46               | stop          | na          | na   | 80        |
| Total time: 18 min<br>Vi (calculated): 80 ul<br>Total Vi (pump): 0.08 ml |                                     |               |             |      | Total time: 18 min<br>Vi (calculated): 80 ul<br>Total Vi (pump): 0.08 ml |                     |               |             |      |           |

**STUDY GROUP 2**

|  | Site 1<br>Anterior External Capsule                                      |               |             |      |           | Site 2<br>Posterior External Capsule                                     |               |             |      |           |
|--|--------------------------------------------------------------------------|---------------|-------------|------|-----------|--------------------------------------------------------------------------|---------------|-------------|------|-----------|
|  | Infusion start time                                                      | rate (ul/min) | time (min.) | Vol. | Cum. Vol. | Infusion start time                                                      | rate (ul/min) | time (min.) | Vol. | Cum. Vol. |
|  | 12:24                                                                    | 1             | 1           | 1    | 0         | 11:52                                                                    | 1             | 1           | 1    | 0         |
|  | 12:25                                                                    | 2             | 1           | 2    | 1         | 11:53                                                                    | 2             | 1           | 2    | 1         |
|  | 12:26                                                                    | 3             | 1           | 3    | 3         | 11:54                                                                    | 3             | 1           | 3    | 3         |
|  | 12:27                                                                    | 4             | 1           | 4    | 6         | 11:55                                                                    | 4             | 1           | 4    | 6         |
|  | 12:28                                                                    | 5             | 14          | 70   | 10        | 11:56                                                                    | 5             | 14          | 70   | 10        |
|  | 12:42                                                                    | stop          | na          | na   | 80        | 12:10                                                                    | stop          | na          | na   | 80        |
|  | Total time: 18 min<br>Vi (calculated): 80 ul<br>Total Vi (pump): 0.08 ml |               |             |      |           | Total time: 18 min<br>Vi (calculated): 80 ul<br>Total Vi (pump): 0.08 ml |               |             |      |           |

**Appendix Table S4. Volume of injected vector suspension calculated based on post-surgery MRI scans.** MRI was performed within 60 min from the end of surgery. Volumes (cm<sup>3</sup>) were measured using T2-weighted images and expressed as percentages of mean hemisphere volume (32.5 cm<sup>3</sup>).

| <b>ID</b>   | <b>Experimental group</b> | <b>Vector</b> | <b>Volume of vector suspension in cm<sup>3</sup><br/>(% of hemisphere volume)</b> |
|-------------|---------------------------|---------------|-----------------------------------------------------------------------------------|
| <b>P1</b>   | Pilot                     | LV.GFP        | 0.36 (1.1)                                                                        |
| <b>P2</b>   |                           |               | 0.36 (1.1)                                                                        |
| <b>S1.1</b> | Study group 1             | LV.hARSA      | 0.43 (1.3)                                                                        |
| <b>S1.2</b> |                           |               | 0.43 (1.3)                                                                        |
| <b>S1.3</b> |                           |               | 0.55 (1.7)                                                                        |
| <b>S2.1</b> | Study group 2             |               | 0.70 (2.1)                                                                        |
| <b>S2.2</b> |                           |               | 0.43 (1.3)                                                                        |
| <b>S2.3</b> |                           |               | 0.43 (1.3)                                                                        |

**Appendix Table S5. Score of pathological lesions in the injected areas of LV.hARSA-treated NHP.** Histopathological lesions were observed in the injected hemisphere of five out of eight animals, including one animal with severe, two with moderate and two with mild inflammatory lesions, which included perivascular mononuclear cell infiltration, gliosis and mononuclear infiltration in the adjacent neuropil, intracytoplasmic eosinophilic accumulation. The score was attributed according to the size and number of observed lesions. Score: ‘0’: within physiological limits, ‘1’: minimal, ‘2’: mild, ‘3’: moderate, ‘4’: severe. EC: External capsule; Thal: Thalamus; Ant: Anterior; Post: Posterior.

| NHP         | Perivascular infiltrations of mononuclear cells |                | Gliosis       |                | Intracytoplasmic eosinophilic accumulations |                | Cumulative severity score |
|-------------|-------------------------------------------------|----------------|---------------|----------------|---------------------------------------------|----------------|---------------------------|
|             | <i>Ant EC</i>                                   | <i>Thal</i>    | <i>Ant EC</i> | <i>Thal</i>    | <i>Ant EC</i>                               | <i>Thal</i>    |                           |
|             | <i>Ant EC</i>                                   | <i>Thal</i>    | <i>Ant EC</i> | <i>Thal</i>    | <i>Ant EC</i>                               | <i>Thal</i>    |                           |
| <b>P1</b>   | 2                                               | 2              | 2             | 2              | 2                                           | 2              | mild                      |
| <b>P2</b>   | 2                                               | 2              | 2             | 2              | 2                                           | 2              | mild                      |
|             | <i>Ant EC</i>                                   | <i>Thal</i>    | <i>Ant EC</i> | <i>Thal</i>    | <i>Ant EC</i>                               | <i>Thal</i>    |                           |
| <b>S1.1</b> | 0                                               | 0              | 0             | 0              | 0                                           | 0              | physiological             |
| <b>S1.2</b> | 2                                               | 3              | 2             | 3              | 1                                           | 2              | moderate                  |
| <b>S1.3</b> | 0                                               | 0              | 0             | 1              | 0                                           | 0              | physiological             |
|             | <i>Ant EC</i>                                   | <i>Post EC</i> | <i>Ant EC</i> | <i>Post EC</i> | <i>Ant EC</i>                               | <i>Post EC</i> |                           |
| <b>S2.1</b> | 0                                               | 0              | 0             | 0              | 0                                           | 0              | physiological             |
| <b>S2.2</b> | 3                                               | 3              | 0             | 2              | 0                                           | 1              | moderate                  |
| <b>S2.3</b> | 4                                               | 4              | 4             | 3              | 3                                           | 1              | severe                    |

**Appendix Table S6. Gene Ontology (GO) analysis of genes targeted by LV integrations following intracerebral LV injection.** The datasets of genes targeted by LV integrations in brain tissues from normal NHP injected with LV.GFP (a) and LV.hARSA (b) were analyzed using online tool DAVID-EASE (<http://david.abcc.ncifcrf.gov/>) to score for the significant enrichment of specific gene classes adopting the default settings and filtering for significant results with a fold change  $\geq 2$ . The first and second columns describe the gene ontology database used that provided significant enrichment results and the enriched gene class, respectively. Counts: number of genes targeted by LV integrations present within the specified gene class; Fold Change: change with respect the expected value. Benjamini: Adjusted *p* value (Benjamini-Hochberg; FDR: False Discovery Rate.

| <b>(a) LV.GFP-injected NHP (n=2)</b> |                                    |               |                    |                  |            |
|--------------------------------------|------------------------------------|---------------|--------------------|------------------|------------|
| <b>GO term / Database</b>            | <b>Gene class</b>                  | <b>Counts</b> | <b>Fold Change</b> | <b>Benjamini</b> | <b>FDR</b> |
| <b>Cellular component</b>            | <b>Synapse</b>                     | 59            | 2.40               | 3.20E-07         | 8.50E-07   |
|                                      | <b>Synapse part</b>                | 46            | 2.70               | 3.90E-07         | 2.00E-06   |
|                                      | <b>Postsynaptic density</b>        | 20            | 4.10               | 3.80E-05         | 3.00E-04   |
|                                      | <b>Postsynaptic membrane</b>       | 28            | 3.00               | 6.10E-05         | 6.50E-04   |
| <b>Molecular function</b>            | <b>Glutamate receptor activity</b> | 12            | 5.40               | 1.40E-03         | 8.80E-03   |
|                                      | <b>PDZ signaling domain</b>        | 28            | 2.70               | 8.50E-03         | 8.40E-03   |
|                                      | <b>GTPase regulator activity</b>   | 57            | 2.00               | 1.50E-03         | 2.30E-03   |
| <b>INTERPRO</b>                      | <b>Laminin G, subdomain 2</b>      | 13            | 4.40               | 1.80E-02         | 3.70E-02   |
| <b>SP_PIR_KEYWORDS (UNIPROT)</b>     | <b>Synapse</b>                     | 32            | 2.30               | 1.10E-03         | 3.70E-02   |
|                                      | <b>Postsynaptic cell membrane</b>  | 24            | 3.30               | 7.00E-05         | 8.80E-04   |
|                                      | <b>Cell junction</b>               | 52            | 2.00               | 2.80E-04         | 5.60E-03   |

| <b>(b) LV.hARSA injected NHP (n=2)</b> |                                    |               |                    |                  |            |
|----------------------------------------|------------------------------------|---------------|--------------------|------------------|------------|
| <b>GO term / Database</b>              | <b>Gene class</b>                  | <b>Counts</b> | <b>Fold Change</b> | <b>Benjamini</b> | <b>FDR</b> |
| <b>Cellular component</b>              | <b>neuron projection</b>           | 41            | 2.20               | 3.00E-04         | 5.40E-03   |
|                                        | <b>dendrite</b>                    | 24            | 2.70               | 1.40E-03         | 3.40E-02   |
|                                        | <b>synapse</b>                     | 53            | 2.70               | 2.30E-08         | 7.00E-08   |
|                                        | <b>synapse part</b>                | 41            | 3.10               | 9.10E-08         | 5.60E-07   |
|                                        | <b>postsynaptic membrane</b>       | 26            | 3.50               | 9.20E-06         | 8.40E-05   |
|                                        | <b>cell junction</b>               | 56            | 2.00               | 1.20E-04         | 1.90E-03   |
| <b>Molecular</b>                       | <b>glutamate receptor activity</b> | 12            | 6.90               | 4.00E-04         | 7.00E-04   |



|                                  |                                                        |    |       |          |          |
|----------------------------------|--------------------------------------------------------|----|-------|----------|----------|
| <b>function</b>                  | <b>ionotropic glutamate receptor activity</b>          | 8  | 8.00  | 8.80E-03 | 4.70E-02 |
|                                  | <b>glutamate receptor activity</b>                     | 12 | 6.90  | 4.00E-04 | 7.00E-04 |
| <b>Biological process</b>        | <b>synaptic transmission</b>                           | 42 | 2.50  | 2.60E-04 | 1.60E-04 |
|                                  | <b>transmission of nerve impulse</b>                   | 45 | 2.30  | 6.00E-04 | 7.60E-04 |
|                                  | <b>neuron development</b>                              | 42 | 2.20  | 2.70E-03 | 5.10E-03 |
|                                  | <b>neuron projection morphogenesis</b>                 | 29 | 2.40  | 1.10E-02 | 4.20E-02 |
| <b>INTERPRO</b>                  | <b>Glutamate receptor, L-glutamate/glycine-binding</b> | 8  | 8.00  | 1.40E-02 | 4.90E-02 |
|                                  | <b>Ionotropic glutamate receptor</b>                   | 8  | 8.00  | 1.40E-02 | 4.90E-02 |
|                                  | <b>Glutamate receptor-related</b>                      | 8  | 8.00  | 1.40E-02 | 4.90E-02 |
|                                  | <b>NMDA receptor</b>                                   | 8  | 8.00  | 1.40E-02 | 4.90E-02 |
|                                  | <b>Extracellular ligand-binding receptor</b>           | 11 | 5.50  | 2.50E-02 | 3.00E-02 |
|                                  | <b>Immunoglobulin I-set</b>                            | 22 | 2.90  | 1.70E-02 | 4.00E-02 |
| <b>SP_PIR_KEYWORDS (UNIPROT)</b> | <b>synapse</b>                                         | 33 | 2.90  | 1.40E-05 | 1.50E-04 |
|                                  | <b>postsynaptic cell membrane</b>                      | 21 | 3.60  | 1.10E-04 | 1.80E-03 |
|                                  | <b>cell junction</b>                                   | 45 | 2.10  | 2.90E-04 | 5.50E-03 |
|                                  | <b>cell adhesion</b>                                   | 46 | 2.00  | 4.20E-04 | 1.00E-02 |
| <b>UP_SEQ_FEATURE</b>            | <b>binding site:Glutamate</b>                          | 6  | 14.00 | 1.40E-02 | 3.90E-02 |
|                                  | <b>region of interest:Glutamate binding</b>            | 6  | 14.00 | 1.40E-02 | 3.90E-02 |

**Appendix Table S7. LV.hGALC-injected NHP and untreated controls used in the study.** The table shows the ID, genotype, gender, age at surgery and at sacrifice, and the treatment of the Krabbe affected rhesus monkeys used in the study.

| <b>ID</b> | <b>Genotype</b> | <b>Gender</b> | <b>Treatment</b> | <b>Age at surgery (days)</b> | <b>Age at the end of experiment (months)</b> |
|-----------|-----------------|---------------|------------------|------------------------------|----------------------------------------------|
| JT02      | Krabbe          | male          | LV.hGALC         | 53                           | 4.6                                          |
| JV02      | WT              | male          | LV.hGALC         | 89                           | 5.8                                          |
| IG97      | Krabbe          | female        | untreated        | na                           | 8                                            |
| JN43      | Krabbe          | female        | untreated        | na                           | 9                                            |
| C180      | Krabbe          | female        | untreated        | na                           | 6                                            |
| KB76      | Krabbe          | female        | untreated        | na                           | 8                                            |

**Appendix Table S8. Neurobehavioral assessment: modified infant neurobehavioral assessment scale (NBAS).** The table shows results on individual scale items as well as composite scores by testing age and group. The scale consists of a 20-minute battery of tests that assess an infant's motor functioning, temperament, and interactive skills. The 42 test items include numerous measurements that correspond to the typical course and manifestation of Krabbe disease, including visual orientation, state control, motor maturity, activity, reflexes and responses, fine and gross motor skills and strength, and temperamental items such as vocalization, self-quieting abilities, fearfulness, and distress. Scores are grouped into four categories: orientation control, motor maturity, and activity. Infants were evaluated using this scale at approximately 7 days, 14 days, and 28 days after birth. Scores are presented for the 2 study animals (JT02 = Krabbe affected; JV02 = normal) as well as historical data collected on genetically normal animals and untreated, Krabbe-affected infants (sample size for each group is indicated in the table). Historical data are presented as means plus one standard deviation.

| Individual Test Items     | ~7 days      |      |                |    |       |       | ~14 days      |      |                |      |       |       | ~28 days      |       |                |      |       |       |
|---------------------------|--------------|------|----------------|----|-------|-------|---------------|------|----------------|------|-------|-------|---------------|-------|----------------|------|-------|-------|
|                           | Normal (n=2) |      | Affected (n=1) |    | JT02  | JV02  | Normal (n=16) |      | Affected (n=6) |      | JT02  | JV02  | Normal (n=22) |       | Affected (n=7) |      | JT02  | JV02  |
|                           | Mean         | SD   | Mean           | SD |       |       | Mean          | SD   | Mean           | SD   |       |       | Mean          | SD    | Mean           | SD   |       |       |
| Initial State             | 2.00         | 0.00 | 2.00           |    | 2.00  | 3.00  | 1.75          | 0.43 | 2.00           | 0.00 | 2.00  | 2.00  | 2.09          | 0.61  | 2.14           | 0.83 | 2.00  | 2.00  |
| Visual Orient             | 1.13         | 0.88 | 1.00           |    | 0.00  | 1.00  | 1.31          | 0.59 | 0.67           | 0.69 | 2.00  | 1.00  | 1.45          | 0.64  | 1.71           | 0.39 | 2.00  | 1.75  |
| Visual Follow             | 2.00         | 1.00 | 2.00           |    | 0.50  | 1.00  | 1.50          | 0.94 | 0.92           | 1.17 | 3.00  | 1.00  | 2.07          | 0.99  | 2.86           | 0.23 | 3.00  | 2.50  |
| Reach & Grasp             | 0.00         | 0.00 | 0.00           |    | 1.00  | 0.00  | 0.56          | 0.86 | 0.67           | 0.94 | 0.00  | 2.00  | 0.50          | 0.72  | 0.71           | 0.88 | 2.00  | 0.00  |
| Startle to Auditory       | 0.00         | 0.00 | 0.00           |    | 1.00  | 0.00  | 0.69          | 0.92 | 0.42           | 0.73 | 3.00  | 0.00  | 0.64          | 0.71  | 0.71           | 1.03 | 0.00  | 0.00  |
| Orient to Auditory        | 1.50         | 0.50 | 0.50           |    | 0.00  | 0.50  | 2.41          | 0.73 | 2.00           | 1.04 | 3.00  | 2.50  | 1.52          | 1.17  | 0.93           | 1.02 | 3.00  | 2.00  |
| Duration of Looking       | 1.50         | 0.50 | 1.00           |    | 0.50  | 1.00  | 2.03          | 0.76 | 1.50           | 0.76 | 3.00  | 2.00  | 2.16          | 0.80  | 2.29           | 0.65 | 3.00  | 1.50  |
| Distraction               | 1.00         | 1.00 | 0.50           |    | 2.00  | 0.00  | 0.97          | 0.57 | 1.58           | 0.61 | 1.00  | 1.00  | 1.09          | 0.60  | 0.86           | 0.83 | 0.00  | 1.00  |
| Attention                 | 1.50         | 0.50 | 2.00           |    | 1.00  | 2.00  | 1.72          | 0.56 | 1.08           | 0.73 | 2.00  | 2.00  | 1.70          | 0.54  | 1.71           | 0.45 | 2.00  | 2.00  |
| Tactile Response          | 0.25         | 0.00 | 0.50           |    | 0.75  | 2.00  | 1.02          | 0.65 | 0.75           | 0.38 | 0.75  | 2.00  | 0.86          | 0.46  | 1.18           | 1.01 | 1.25  | 1.00  |
| Galants                   | 0.25         | 0.25 | 2.00           |    | 1.00  | 2.00  | 1.03          | 0.89 | 0.08           | 0.19 | 1.00  | 2.00  | 1.09          | 0.78  | 0.93           | 1.02 | 0.50  | 1.00  |
| Palmar & Plantar Grasp    | 2.38         | 0.63 | 2.00           |    | 2.50  | 3.00  | 2.52          | 0.50 | 2.63           | 0.54 | 2.50  | 3.00  | 2.55          | 0.40  | 1.89           | 0.55 | 2.00  | 2.00  |
| Inversion                 | 1.50         | 0.50 | 1.00           |    | 2.00  | 0.50  | 1.16          | 0.74 | 1.83           | 0.37 | 1.00  | 1.00  | 1.55          | 0.50  | 2.00           | 0.00 | 2.00  | 1.50  |
| Head Posture Prone        | 1.50         | 0.50 | 1.00           |    | 1.00  | 1.00  | 1.63          | 0.48 | 1.33           | 0.47 | 1.00  | 1.00  | 1.89          | 0.37  | 1.00           | 0.76 | 2.00  | 2.00  |
| Head Posture Supine       | 2.00         | 0.00 | 0.00           |    | 1.00  | 1.00  | 1.78          | 0.47 | 1.17           | 0.90 | 1.00  | 2.00  | 1.18          | 0.72  | 1.29           | 0.45 | 0.50  | 0.50  |
| Body Righting             | 5.50         | 0.50 | 5.00           |    | 6.00  | 5.00  | 5.88          | 0.33 | 5.83           | 0.37 | 5.00  | 6.00  | 5.59          | 1.19  | 5.00           | 1.60 | 6.00  | 6.00  |
| Body Righting - blindfold | 5.50         | 0.50 | 2.00           |    | 6.00  | 6.00  | 5.00          | 1.70 | 5.33           | 1.49 | 6.00  | 5.00  | 5.00          | 1.53  | 4.57           | 1.68 | 5.00  | 6.00  |
| Aversion to Back          | 1.50         | 0.50 | 1.00           |    | 2.00  | 1.00  | 1.44          | 0.61 | 1.58           | 0.45 | 2.00  | 2.00  | 1.45          | 0.66  | 1.57           | 0.49 | 2.00  | 2.00  |
| Aversion to Blindfold     | 1.50         | 0.50 | 0.00           |    | 2.00  | 0.00  | 1.41          | 0.59 | 1.50           | 0.76 | 2.00  | 1.00  | 1.39          | 0.68  | 1.43           | 0.49 | 2.00  | 2.00  |
| Traction                  | 1.00         | 0.00 | 0.00           |    | 1.00  | 2.00  | 1.50          | 0.50 | 1.17           | 0.37 | 1.00  | 2.00  | 1.66          | 0.59  | 1.29           | 0.88 | 1.00  | 2.00  |
| Labyrinthian Righting     | 1.50         | 0.50 | 2.00           |    | 0.00  | 0.00  | 1.41          | 1.16 | 0.25           | 0.56 | 2.00  | 1.50  | 1.80          | 1.15  | 0.57           | 0.68 | 1.00  | 1.00  |
| Response Speed            | 1.50         | 0.50 | 1.00           |    | 1.50  | 1.50  | 1.66          | 0.70 | 1.67           | 0.69 | 2.00  | 2.00  | 2.16          | 0.46  | 1.64           | 0.35 | 2.00  | 2.00  |
| Intensity (vocals)        | 1.00         | 0.00 | 0.00           |    | 0.00  | 1.00  | 0.78          | 0.83 | 1.08           | 0.61 | 1.00  | 0.50  | 0.93          | 0.59  | 1.43           | 0.68 | 0.50  | 2.00  |
| Soothability              | 2.00         | 0.00 | 1.00           |    | 1.00  | 2.00  | 1.28          | 0.71 | 1.50           | 0.50 | 2.00  | 1.00  | 1.70          | 0.94  | 1.97           | 0.95 | 1.50  | 3.00  |
| Cuddliness                | 2.00         | 0.00 | 2.00           |    | 2.00  | 2.00  | 1.81          | 0.39 | 2.00           | 0.00 | 2.00  | 2.00  | 1.59          | 0.72  | 1.67           | 0.47 | 2.00  | 1.00  |
| Irritability/Distress     | 1.00         | 0.00 | 1.50           |    | 1.00  | 0.50  | 1.09          | 0.62 | 1.25           | 0.56 | 1.00  | 2.00  | 0.95          | 0.56  | 0.86           | 0.83 | 1.00  | 0.00  |
| Consolability             | 2.00         | 0.00 | 2.00           |    | 1.00  | 1.50  | 1.75          | 0.43 | 1.67           | 0.47 | 1.00  | 2.00  | 1.48          | 0.61  | 1.36           | 0.58 | 2.00  | 0.00  |
| Fearfulness               | 1.00         | 0.00 | 0.00           |    | 0.00  | 0.00  | 0.63          | 0.48 | 0.67           | 0.75 | 0.00  | 0.00  | 1.16          | 0.51  | 1.00           | 0.76 | 1.00  | 1.00  |
| Self mouth                | 1.00         | 0.00 | 0.00           |    | 2.00  | 2.00  | 1.06          | 0.75 | 0.83           | 0.69 | 2.00  | 0.00  | 1.00          | 0.67  | 0.71           | 0.88 | 2.00  | 2.00  |
| Struggle                  | 1.00         | 0.00 | 0.00           |    | 1.00  | 1.00  | 0.75          | 0.66 | 0.83           | 0.69 | 1.00  | 1.00  | 1.39          | 0.93  | 0.79           | 0.75 | 0.50  | 2.00  |
| Predominate State         | 2.50         | 0.50 | 1.00           |    | 2.00  | 2.00  | 2.00          | 0.59 | 1.67           | 0.47 | 2.00  | 2.00  | 2.45          | 0.52  | 2.64           | 0.95 | 2.00  | 3.50  |
| Maintains Balance         | 2.00         | 0.00 | 0.00           |    | 1.00  | 1.50  | 2.13          | 0.60 | 1.83           | 0.37 | 2.00  | 2.00  | 2.59          | 0.49  | 2.00           | 0.93 | 2.00  | 2.50  |
| Resistance - Passive MV   | 2.00         | 0.00 | 0.00           |    | 1.50  | 1.50  | 1.95          | 0.70 | 1.75           | 0.75 | 2.00  | 2.00  | 2.39          | 0.80  | 1.64           | 0.58 | 2.00  | 3.00  |
| Active Power              | 2.00         | 0.00 | 0.00           |    | 1.50  | 1.00  | 1.75          | 0.53 | 1.42           | 0.45 | 1.50  | 2.00  | 1.98          | 0.49  | 1.36           | 0.44 | 1.50  | 2.00  |
| Placing Response          | 1.00         | 0.00 | 0.50           |    | 0.50  | 1.00  | 0.97          | 0.08 | 1.00           | 0.00 | 1.00  | 1.00  | 0.98          | 0.10  | 0.86           | 0.23 | 1.00  | 1.00  |
| Parachute                 | 1.00         | 0.00 | 0.00           |    | 0.00  | 0.50  | 1.00          | 0.79 | 1.33           | 0.75 | 1.00  | 1.00  | 1.55          | 0.66  | 1.29           | 0.70 | 1.00  | 2.00  |
| Rotation Test             | 1.75         | 0.25 | 1.50           |    | 1.50  | 1.50  | 2.00          | 0.00 | 1.42           | 0.53 | 2.00  | 2.00  | 1.66          | 41.00 | 1.79           | 0.36 | 2.00  | 1.50  |
| Moro                      | 1.00         | 0.25 | 0.00           |    | 0.50  | 0.50  | 0.58          | 0.26 | 0.75           | 0.20 | 0.75  | 1.25  | 0.70          | 0.42  | 0.57           | 0.46 | 0.50  | 1.00  |
| Restrain                  | 1.00         | 0.00 | 0.50           |    | 0.00  | 2.00  | 1.31          | 1.04 | 0.50           | 0.50 | 3.00  | 2.50  | 1.07          | 1.13  | 0.86           | 1.12 | 3.00  | 0.00  |
| Persistence               | 1.00         | 0.00 | 0.50           |    | 0.00  | 1.50  | 1.00          | 0.79 | 0.50           | 0.50 | 2.00  | 2.00  | 1.05          | 1.07  | 0.71           | 0.88 | 3.00  | 1.00  |
| Root                      | 0.00         | 0.00 | 2.00           |    | 0.50  | 1.50  | 0.81          | 0.56 | 0.67           | 0.80 | 0.00  | 2.00  | 0.66          | 0.73  | 0.64           | 0.69 | 1.00  | 0.00  |
| Composite Scores          |              |      |                |    |       |       |               |      |                |      |       |       |               |       |                |      |       |       |
| Orientation               | 6.13         | 2.88 | 6.00           |    | 2.00  | 5.00  | 6.56          | 2.17 | 4.17           | 3.21 | 10.00 | 6.00  | 7.39          | 2.45  | 8.57           | 1.30 | 10.00 | 7.75  |
| State Control             | 6.50         | 0.50 | 4.50           |    | 5.00  | 5.00  | 5.59          | 0.85 | 5.42           | 0.84 | 5.00  | 7.00  | 6.27          | 0.91  | 5.64           | 0.52 | 5.50  | 5.50  |
| Motor Maturity            | 7.75         | 2.25 | 4.00           |    | 4.00  | 4.50  | 7.59          | 1.85 | 4.83           | 2.09 | 6.00  | 7.50  | 8.57          | 1.72  | 5.00           | 1.71 | 6.50  | 6.50  |
| Activity                  | 7.75         | 0.25 | 3.00           |    | 3.50  | 3.50  | 6.09          | 1.72 | 4.50           | 1.41 | 4.00  | 6.00  | 6.86          | 1.54  | 4.93           | 2.27 | 7.00  | 7.00  |
| Grouped Items             |              |      |                |    |       |       |               |      |                |      |       |       |               |       |                |      |       |       |
| Orientation               | 7.13         | 1.88 | 6.50           |    | 5.00  | 5.00  | 8.22          | 2.09 | 6.17           | 2.69 | 14.00 | 7.00  | 9.11          | 2.10  | 10.14          | 1.34 | 10.00 | 8.75  |
| Neuromotor                | 12.25        | 1.75 | 5.00           |    | 6.00  | 6.50  | 11.34         | 2.57 | 7.83           | 2.59 | 9.00  | 10.50 | 13.07         | 1.93  | 8.43           | 2.86 | 10.50 | 11.00 |
| Reflex                    | 16.13        | 2.13 | 12.50          |    | 17.00 | 17.50 | 16.78         | 1.61 | 16.63          | 1.90 | 16.25 | 19.25 | 15.25         | 2.95  | 14.46          | 3.67 | 16.50 | 16.50 |
| Muscle Tone               | 7.50         | 0.50 | 1.00           |    | 5.00  | 4.50  | 7.11          | 1.57 | 5.67           | 1.34 | 5.50  | 7.00  | 7.43          | 1.14  | 5.29           | 1.16 | 6.00  | 7.50  |
| Temperament               | 6.00         | 0.00 | 3.00           |    | 2.00  | 5.50  | 5.09          | 2.14 | 5.00           | 1.12 | 7.00  | 6.00  | 5.82          | 2.13  | 6.11           | 1.75 | 7.00  | 6.00  |

**Appendix Table S9. Neurobehavioral assessment: modified Bayley’s scale for infant development.** The table shows results on individual scale items as well as composite scores by testing age and group. The original scale developed for use with human infants has been modified for nonhuman primates between the ages of two months to one year. The 10-minute test consists of problem-solving, motor, and temperament tests. The 15 separate variables are collapsed to three scores for analysis (problem-solving, motor abilities, and temperament). Infants were evaluated monthly beginning at two months of age. Scores are presented for the 2 study animals (JT02 = Krabbe affected; JV02 = normal) as well as historical data collected on genetically normal animals and untreated, Krabbe-affected infants (sample size for each group is indicated in the table). For the study animals, scores are reported as pre-surgery and post-surgery. Historical data are presented as means plus one standard deviation.

| Individual Test Items    | 2 months      |      |                 |      |      |      | 3 months      |      |                 |      |      |      | 4 months      |       |                |      | 5 months     |      |                |       | 6 months     |      |                |      |       |       |       |      |      |       |  |
|--------------------------|---------------|------|-----------------|------|------|------|---------------|------|-----------------|------|------|------|---------------|-------|----------------|------|--------------|------|----------------|-------|--------------|------|----------------|------|-------|-------|-------|------|------|-------|--|
|                          | Normal (n=20) |      | Affected (n=12) |      | JT02 |      | Normal (n=20) |      | Affected (n=10) |      | JV02 |      | Normal (n=13) |       | Affected (n=6) |      | Normal (n=6) |      | Affected (n=5) |       | Normal (n=1) |      | Affected (n=7) |      |       |       |       |      |      |       |  |
|                          | Mean          | SD   | Mean            | SD   | Pre  | Post | Mean          | SD   | Mean            | SD   | JT02 | Pre  | Post          | Mean  | SD             | Mean | SD           | JT02 | JV02           | Mean  | SD           | Mean | SD             | JT02 | JV02  |       |       |      |      |       |  |
| Visual Orient            | 1.70          | 1.19 | 1.75            | 1.09 | 0.00 | 3.00 | 3.00          | 1.75 | 1.18            | 1.80 | 1.17 | 2.00 | 3.00          | 3.00  | 2.31           | 0.99 | 1.83         | 1.21 | 3.00           | 0.00  | 2.83         | 0.37 | 1.20           | 1.17 | 0.00  | 1.00  | 2.00  | 1.57 | 1.05 | 3.00  |  |
| Lift Inverted Cup        | 0.85          | 0.73 | 0.63            | 0.84 | 1.00 | 0.00 | 0.00          | 0.55 | 1.02            | 0.50 | 0.81 | 0.00 | 0.00          | 0.00  | 0.46           | 0.63 | 0.33         | 0.75 | 2.00           | 0.00  | 0.83         | 1.21 | 0.80           | 0.98 | 2.00  | 0.00  | 3.00  | 1.57 | 1.18 | 0.00  |  |
| Uncover Toy              | 0.45          | 0.50 | 0.50            | 0.65 | 2.00 | 0.00 | 0.00          | 0.75 | 1.09            | 0.50 | 0.67 | 2.00 | 0.00          | 3.00  | 0.69           | 1.26 | 0.00         | 0.00 | 3.00           | 1.00  | 0.33         | 0.47 | 0.80           | 1.17 | 2.00  | 0.00  | 1.00  | 0.71 | 1.03 | 0.00  |  |
| Pull String to get toy   | 0.75          | 0.70 | 0.58            | 0.49 | 1.00 | 1.00 | 1.00          | 0.35 | 0.57            | 0.80 | 0.75 | 1.00 | 0.50          | 0.00  | 0.23           | 0.42 | 0.75         | 0.80 | 1.00           | 0.00  | 1.00         | 1.00 | 0.60           | 0.49 | 2.00  | 0.00  | 1.50  | 0.71 | 0.70 | 0.00  |  |
| Remove Treat from bottle | 0.98          | 1.01 | 0.33            | 0.75 | 1.00 | 2.00 | 0.00          | 0.55 | 0.92            | 0.30 | 0.64 | 0.00 | 0.00          | 0.00  | 0.23           | 0.58 | 0.33         | 0.75 | 2.00           | 0.00  | 0.33         | 0.75 | 0.00           | 0.00 | 2.00  | 0.00  | 2.00  | 1.29 | 0.88 | 0.00  |  |
| Object Orientation       | 1.13          | 0.41 | 1.08            | 0.84 | 1.50 | 2.00 | 1.00          | 1.25 | 0.89            | 0.80 | 0.56 | 1.50 | 0.50          | 1.00  | 1.04           | 0.69 | 0.67         | 0.75 | 3.00           | 0.00  | 1.08         | 0.98 | 0.90           | 0.80 | 2.50  | 0.00  | 2.50  | 1.57 | 0.68 | 0.00  |  |
| Distractability          | 1.20          | 0.60 | 0.96            | 0.88 | 0.00 | 0.00 | 1.00          | 0.95 | 0.82            | 1.35 | 0.78 | 0.00 | 2.00          | 2.00  | 1.19           | 0.91 | 1.50         | 0.76 | 0.00           | 2.00  | 1.33         | 0.94 | 1.40           | 0.80 | 0.00  | 2.00  | 1.00  | 0.79 | 0.75 | 2.00  |  |
| Goal Directedness        | 0.93          | 0.51 | 0.63            | 0.51 | 1.00 | 1.00 | 0.50          | 0.60 | 0.66            | 0.55 | 0.47 | 0.50 | 0.00          | 1.00  | 0.62           | 0.81 | 0.67         | 0.75 | 3.00           | 0.00  | 0.75         | 0.90 | 0.60           | 0.49 | 2.00  | 0.00  | 2.00  | 0.93 | 0.42 | 0.00  |  |
| Labyrinthian Righting    | 1.25          | 0.89 | 0.83            | 0.51 | 1.00 | 2.00 | 2.00          | 1.50 | 0.67            | 0.85 | 0.55 | 2.00 | 1.00          | 2.00  | 1.62           | 0.62 | 0.67         | 0.94 | 2.00           | 1.00  | 1.33         | 0.75 | 0.60           | 0.80 | 2.00  | 0.00  | 2.00  | 1.00 | 0.76 | 0.50  |  |
| Muscle Tone              | 2.23          | 0.60 | 1.21            | 0.58 | 1.75 | 2.00 | 3.00          | 2.45 | 0.52            | 1.15 | 0.76 | 1.50 | 3.00          | 2.50  | 2.42           | 0.47 | 1.21         | 0.58 | 1.50           | 3.00  | 2.75         | 0.56 | 1.20           | 0.66 | 2.00  | 3.00  | 3.00  | 1.00 | 0.57 | 3.00  |  |
| Active Power             | 1.33          | 0.55 | 0.54            | 0.43 | 1.50 | 1.00 | 1.50          | 1.55 | 0.52            | 0.65 | 0.50 | 0.75 | 2.00          | 1.50  | 1.65           | 0.46 | 0.92         | 0.61 | 0.50           | 2.00  | 1.75         | 0.56 | 0.70           | 0.51 | 1.50  | 2.00  | 2.00  | 0.71 | 0.36 | 2.00  |  |
| Tension                  | 2.10          | 0.44 | 1.17            | 0.82 | 2.00 | 1.00 | 3.00          | 2.30 | 0.56            | 1.53 | 0.90 | 1.00 | 3.00          | 3.00  | 2.54           | 0.63 | 1.75         | 1.22 | 2.00           | 3.00  | 2.67         | 0.47 | 1.40           | 0.73 | 2.00  | 3.00  | 2.00  | 1.36 | 0.44 | 4.00  |  |
| Fine Motor Coordination  | 1.57          | 0.49 | 1.00            | 0.00 | 1.00 | 1.00 |               | 1.89 | 0.28            | 1.00 | 0.00 | 1.00 | 2.00          | 2.00  | 1.94           | 0.17 | 1.00         | 0.82 | 1.00           | 2.00  | 2.00         | 0.00 | 0.75           | 0.43 | 1.00  | 2.00  | 2.00  | 0.90 | 0.20 | 2.00  |  |
| Responsiveness to Tester | 1.73          | 0.99 | 1.75            | 1.09 | 0.00 | 0.00 | 3.00          | 1.60 | 0.97            | 1.70 | 0.90 | 0.00 | 3.00          | 3.00  | 1.54           | 1.01 | 1.17         | 1.21 | 0.00           | 3.00  | 2.00         | 0.82 | 1.60           | 0.49 | 0.00  | 3.00  | 2.00  | 1.43 | 0.90 | 3.00  |  |
| Fearfulness              | 1.05          | 1.07 | 1.33            | 1.03 | 0.00 | 0.00 | 1.00          | 1.48 | 0.86            | 1.10 | 1.30 | 1.00 | 0.00          | 1.00  | 2.23           | 1.31 | 0.67         | 1.11 | 1.00           | 0.00  | 1.50         | 1.38 | 0.40           | 0.49 | 1.00  | 1.00  | 0.00  | 0.86 | 0.64 | 1.00  |  |
| Irritability             | 1.55          | 1.07 | 1.92            | 1.38 | 1.00 | 1.00 | 3.00          | 1.23 | 1.05            | 2.70 | 0.64 | 0.00 | 3.00          | 3.00  | 1.54           | 1.08 | 2.25         | 1.07 | 0.00           | 3.00  | 2.00         | 1.15 | 3.00           | 0.00 | 0.00  | 3.00  | 3.00  | 2.29 | 0.88 | 2.50  |  |
| Endurance                | 2.70          | 0.90 | 1.92            | 1.19 | 3.00 | 3.00 | 3.00          | 3.00 | 0.00            | 2.70 | 0.90 | 3.00 | 3.00          | 3.00  | 3.00           | 0.00 | 2.50         | 1.12 | 3.00           | 3.00  | 3.00         | 0.00 | 2.20           | 1.17 | 3.00  | 0.00  | 3.00  | 2.14 | 1.36 | 3.00  |  |
| Activity                 | 1.45          | 0.86 | 1.08            | 1.06 | 0.00 | 0.00 | 1.50          | 1.03 | 1.08            | 1.00 | 0.97 | 0.00 | 2.00          | 2.00  | 1.35           | 0.95 | 0.92         | 1.02 | 0.00           | 3.00  | 1.83         | 1.07 | 0.80           | 0.75 | 0.00  | 3.00  | 1.50  | 0.71 | 0.70 | 3.00  |  |
| Response Intensity       | 0.95          | 0.72 | 1.50            | 0.45 | 0.00 | 1.00 | 1.50          | 0.60 | 0.60            | 1.45 | 0.65 | 0.00 | 1.50          | 2.00  | 0.96           | 0.80 | 1.17         | 0.37 | 0.00           | 2.00  | 1.33         | 0.75 | 1.80           | 0.40 | 0.00  | 1.00  | 2.00  | 1.29 | 0.52 | 2.00  |  |
| Struggle                 | 1.43          | 1.03 | 1.08            | 1.11 | 0.00 | 0.00 | 2.50          | 1.33 | 1.08            | 1.15 | 1.10 | 0.00 | 2.00          | 1.50  | 1.42           | 0.96 | 1.17         | 1.34 | 0.00           | 3.00  | 1.75         | 1.15 | 0.60           | 0.80 | 0.00  | 3.00  | 0.00  | 0.57 | 0.49 | 3.00  |  |
| Consolability            | 1.35          | 0.55 | 1.09            | 0.70 | 0.00 | 0.00 | 2.00          | 1.38 | 0.57            | 1.15 | 0.81 | 0.00 | 2.00          | 2.00  | 1.31           | 0.61 | 1.33         | 0.75 | 0.00           | 2.00  | 0.67         | 0.75 | 1.50           | 0.45 | 0.00  | 2.00  | 1.50  | 1.00 | 0.76 | 2.00  |  |
| Composite Scores         |               |      |                 |      |      |      |               |      |                 |      |      |      |               |       |                |      |              |      |                |       |              |      |                |      |       |       |       |      |      |       |  |
| Cognitive                | 6.78          | 2.41 | 5.50            | 3.52 | 7.50 | 9.00 | 5.50          | 5.80 | 3.72            | 5.25 | 3.25 | 7.00 | 4.00          | 8.00  | 5.58           | 3.76 | 4.58         | 3.03 | 17.00          | 1.00  | 7.17         | 4.31 | 4.90           | 3.04 | 12.50 | 1.00  | 14.00 | 8.36 | 3.99 | 3.00  |  |
| Motor                    | 6.90          | 1.72 | 3.75            | 2.01 | 6.25 | 6.00 | 9.50          | 7.80 | 1.33            | 4.18 | 2.43 | 5.25 | 9.00          | 9.00  | 8.23           | 1.12 | 4.54         | 2.35 | 6.00           | 9.00  | 8.50         | 2.06 | 3.90           | 1.83 | 7.50  | 8.00  | 9.00  | 4.07 | 1.08 | 9.50  |  |
| Behavior                 | 8.45          | 3.60 | 8.08            | 5.28 | 1.00 | 2.00 | 13.50         | 7.15 | 4.07            | 9.15 | 3.61 | 0.00 | 13.50         | 13.50 | 8.12           | 3.49 | 8.00         | 3.93 | 0.00           | 16.00 | 9.58         | 3.35 | 9.30           | 1.17 | 0.00  | 15.00 | 10.00 | 7.29 | 2.93 | 15.50 |  |

**Appendix Table S10. Summary of statistics for the main figures and tables**

| Figure                         | Statistical analysis         |                      |                |                    |                    |
|--------------------------------|------------------------------|----------------------|----------------|--------------------|--------------------|
| <b>Fig.4C</b>                  | <b>Two-way ANOVA</b>         |                      |                |                    |                    |
|                                | Source of Variation          | % of total variation | P value        |                    |                    |
|                                | Interaction                  | 2.52                 | 0.3201         |                    |                    |
|                                | region                       | 83.43                | < 0.0001       |                    |                    |
|                                | group                        | 3.43                 | 0.0371         |                    |                    |
|                                | Source of Variation          | P value summary      | Significant?   |                    |                    |
|                                | Interaction                  | ns                   | No             |                    |                    |
|                                | region                       | ***                  | Yes            |                    |                    |
|                                | group                        | *                    | Yes            |                    |                    |
|                                | Source of Variation          | Df                   | Sum-of-squares | Mean square        | F                  |
|                                | Interaction                  | 3                    | 0.02752        | 0.009174           | 1.264              |
|                                | region                       | 3                    | 0.9119         | 0.304              | 41.88              |
|                                | group                        | 1                    | 0.03753        | 0.03753            | 5.171              |
|                                | Residual                     | 16                   | 0.1161         | 0.007257           |                    |
|                                | <b>Bonferroni posttests</b>  |                      |                |                    |                    |
|                                | Physiological vs TOTAL BRAIN |                      |                |                    |                    |
|                                | group                        | Physiological        | TOTAL BRAIN    | Difference         | 95% CI of diff.    |
|                                | GROUP 1                      | 1                    | 1.301          | 0.3014             | 0.09213 to 0.5106  |
|                                | GROUP 2                      | 1                    | 1.194          | 0.1944             | -0.01480 to 0.4037 |
|                                | group                        | Difference           | t              | P value            | Summary            |
| GROUP 1                        | 0.3014                       | 4.333                | P<0.01         | **                 |                    |
| GROUP 2                        | 0.1944                       | 2.795                | P < 0.05       | *                  |                    |
| Physiological vs INJECTED      |                              |                      |                |                    |                    |
| group                          | Physiological                | INJECTED             | Difference     | 95% CI of diff.    |                    |
| GROUP 1                        | 1                            | 1.505                | 0.5046         | 0.2953 to 0.7138   |                    |
| GROUP 2                        | 1                            | 1.471                | 0.4706         | 0.2613 to 0.6798   |                    |
| group                          | Difference                   | t                    | P value        | Summary            |                    |
| GROUP 1                        | 0.5046                       | 7.254                | P<0.001        | ***                |                    |
| GROUP 2                        | 0.4706                       | 6.766                | P<0.001        | ***                |                    |
| Physiological vs CONTRALATERAL |                              |                      |                |                    |                    |
| group                          | Physiological                | CONTRALATER          | Difference     | 95% CI of diff.    |                    |
| GROUP 1                        | 1                            | 1.123                | 0.1228         | -0.08644 to 0.3321 |                    |
| GROUP 2                        | 1                            | 0.9474               | -0.05263       | -0.2619 to 0.1566  |                    |
| group                          | Difference                   | t                    | P value        | Summary            |                    |
| GROUP 1                        | 0.1228                       | 1.766                | P > 0.05       | ns                 |                    |
| GROUP 2                        | -0.05263                     | 0.7567               | P > 0.05       | ns                 |                    |

| Figure                            | Statistical analysis        |                      |                |                 |                                 | Statistical analysis          |                      |                |                   |                 |
|-----------------------------------|-----------------------------|----------------------|----------------|-----------------|---------------------------------|-------------------------------|----------------------|----------------|-------------------|-----------------|
| Fig.5B                            | <b>Two-way ANOVA</b>        |                      |                |                 |                                 | <b>Two-way ANOVA</b>          |                      |                |                   |                 |
|                                   | UT/LV.GFP vs S1.1 injected  |                      |                |                 |                                 | UT/LV.GFP vs S1.1 contra      |                      |                |                   |                 |
|                                   | Source of Variation         | % of total variation | P value        |                 |                                 | Source of Variation           | % of total variation | P value        |                   |                 |
|                                   | Interaction                 | 6.56                 | 0.012          |                 |                                 | Interaction                   | 15.33                | 0.0014         |                   |                 |
|                                   | hem                         | 43.61                | < 0.0001       |                 |                                 | hem                           | 13.39                | < 0.0001       |                   |                 |
|                                   | slice                       | 12.17                | < 0.0001       |                 |                                 | slice                         | 27.93                | < 0.0001       |                   |                 |
|                                   | Source of Variation         | P value summary      | Significant?   |                 |                                 | Source of Variation           | P value summary      | Significant?   |                   |                 |
|                                   | Interaction                 | *                    | Yes            |                 |                                 | Interaction                   | **                   | Yes            |                   |                 |
|                                   | hem                         | ***                  | Yes            |                 |                                 | hem                           | ***                  | Yes            |                   |                 |
|                                   | slice                       | ***                  | Yes            |                 |                                 | slice                         | ***                  | Yes            |                   |                 |
|                                   | Source of Variation         | Df                   | Sum-of-squares | Mean square     | F                               | Source of Variation           | Df                   | Sum-of-squares | Mean square       | F               |
|                                   | Interaction                 | 14                   | 475.3          | 33.95           | 2.171                           | Interaction                   | 7                    | 268.8          | 38.4              | 3.76            |
|                                   | hem                         | 2                    | 3159           | 1580            | 101                             | hem                           | 1                    | 234.8          | 234.8             | 22.99           |
|                                   | slice                       | 7                    | 881.7          | 126             | 8.054                           | slice                         | 7                    | 489.6          | 69.95             | 6.849           |
|                                   | Residual                    | 131                  | 2049           | 15.64           |                                 | Residual                      | 79                   | 806.8          | 10.21             |                 |
|                                   | <b>Bonferroni posttests</b> |                      |                |                 |                                 | <b>Bonferroni posttests</b>   |                      |                |                   |                 |
|                                   | slice                       | UT/LV.GFP            | S1.1 INJECTED  | Difference      | 95% CI of diff.                 | slice                         | UT/LV.GFP            | S1.1 CONTRAL   | Difference        | 95% CI of diff. |
|                                   | 2                           | 29.92                | 37.36          | 7.435           | -2.707 to 17.56                 | 2                             | 29.92                | 29.91          | -0.006664         | -7.338 to 7.324 |
|                                   | 3                           | 29.74                | 45.35          | 15.61           | 9.903 to 21.32                  | 3                             | 29.74                | 31.66          | 1.914             | -2.448 to 6.277 |
|                                   | 4                           | 29.28                | 40.17          | 10.89           | 3.637 to 18.14                  | 4                             | 29.28                | 31.43          | 2.152             | -3.644 to 7.947 |
|                                   | 5                           | 29.24                | 39.31          | 10.06           | 2.812 to 17.32                  | 5                             | 29.24                | 32.7           | 3.456             | -2.042 to 8.954 |
|                                   | 6                           | 30.38                | 40.15          | 9.776           | 3.516 to 16.04                  | 6                             | 30.38                | 32.25          | 1.878             | -2.854 to 6.610 |
|                                   | 7                           | 31.15                | 39.94          | 8.788           | 2.577 to 15.00                  | 7                             | 31.15                | 31.73          | 0.5775            | -3.912 to 5.067 |
|                                   | 8                           | 31.71                | 45.63          | 13.92           | 5.134 to 22.70                  | 8                             | 31.71                | 34.8           | 3.092             | -3.257 to 9.440 |
|                                   | 9                           | 32.38                | 50.36          | 17.98           | 7.838 to 28.12                  | 9                             | 32.38                | 47.52          | 15.14             | 7.812 to 22.47  |
|                                   | slice                       | Difference           | t              | P value         | Summary                         | slice                         | Difference           | t              | P value           | Summary         |
|                                   | 2                           | 7.435                | 2.303          | P > 0.05        | ns                              | 2                             | -0.006664            | 0.002554       | P > 0.05          | ns              |
|                                   | 3                           | 15.61                | 8.591          | P<0.001         | ***                             | 3                             | 1.914                | 1.233          | P > 0.05          | ns              |
|                                   | 4                           | 10.89                | 4.716          | P<0.001         | ***                             | 4                             | 2.152                | 1.043          | P > 0.05          | ns              |
|                                   | 5                           | 10.06                | 4.358          | P<0.001         | ***                             | 5                             | 3.456                | 1.766          | P > 0.05          | ns              |
|                                   | 6                           | 9.776                | 4.905          | P<0.001         | ***                             | 6                             | 1.878                | 1.115          | P > 0.05          | ns              |
|                                   | 7                           | 8.788                | 4.444          | P<0.001         | ***                             | 7                             | 0.5775               | 0.3614         | P > 0.05          | ns              |
|                                   | 8                           | 13.92                | 4.977          | P<0.001         | ***                             | 8                             | 3.092                | 1.368          | P > 0.05          | ns              |
| 9                                 | 17.98                       | 5.568                | P<0.001        | ***             | 9                               | 15.14                         | 5.804                | P<0.001        | ***               |                 |
| <b>UT/LV.GFP vs S1.2 injected</b> |                             |                      |                |                 | <b>UT/LV.GFP vs S1.2 contra</b> |                               |                      |                |                   |                 |
| Source of Variation               | % of total variation        | P value              |                |                 | Source of Variation             | % of total variation          | P value              |                |                   |                 |
| Interaction                       | 2.53                        | 0.3435               |                |                 | Interaction                     | 11.83                         | 0.1632               |                |                   |                 |
| hem                               | 60.02                       | < 0.0001             |                |                 | hem                             | 5.56                          | 0.1879               |                |                   |                 |
| slice                             | 5.34                        | 0.0813               |                |                 | slice                           | 4.87                          | 0.4594               |                |                   |                 |
| Source of Variation               | P value summary             | Significant?         |                |                 | Source of Variation             | P value summary               | Significant?         |                |                   |                 |
| Interaction                       | ns                          | No                   |                |                 | Interaction                     | ns                            | No                   |                |                   |                 |
| hem                               | ***                         | Yes                  |                |                 | hem                             | ns                            | No                   |                |                   |                 |
| slice                             | ns                          | No                   |                |                 | slice                           | ns                            | No                   |                |                   |                 |
| Source of Variation               | Df                          | Sum-of-squares       | Mean square    | F               | Source of Variation             | Df                            | Sum-of-squares       | Mean square    | F                 |                 |
| Interaction                       | 3                           | 23.23                | 7.744          | 1.145           | Interaction                     | 2                             | 38.06                | 19.03          | 1.951             |                 |
| hem                               | 1                           | 551.7                | 551.7          | 81.56           | hem                             | 1                             | 17.88                | 17.88          | 1.833             |                 |
| slice                             | 3                           | 49.06                | 16.35          | 2.417           | slice                           | 2                             | 15.66                | 7.828          | 0.8027            |                 |
| Residual                          | 38                          | 257.1                | 6.765          |                 | Residual                        | 25                            | 243.8                | 9.753          |                   |                 |
| <b>Bonferroni posttests</b>       |                             |                      |                |                 | <b>Bonferroni posttests</b>     |                               |                      |                |                   |                 |
| slice                             | UT/LV.GFP                   | S1.2 injected        | Difference     | 95% CI of diff. | slice                           | UT/LV.GFP                     | S1.2 contra          | Difference     | 95% CI of diff.   |                 |
| 3                                 | 29.74                       | 38.47                | 8.727          | 5.290 to 12.16  | 3                               | 29.35                         | 34.2                 | 4.851          | -0.05594 to 9.758 |                 |
| 4                                 | 29.28                       | 36.74                | 7.46           | 2.885 to 12.04  | 6                               | 30.19                         | 30.65                | 0.4575         | -4.450 to 5.365   |                 |
| 5                                 | 29.24                       | 34.16                | 4.918          | 0.3424 to 9.493 | 9                               | 32.38                         | 31.95                | -0.4267        | -6.547 to 5.694   |                 |
| 6                                 | 30.38                       | 38.97                | 8.591          | 4.044 to 13.14  |                                 |                               |                      |                |                   |                 |
| slice                             | Difference                  | t                    | P value        | Summary         | slice                           | Difference                    | t                    | P value        | Summary           |                 |
| 3                                 | 8.727                       | 6.658                | P<0.001        | ***             | 3                               | 4.851                         | 2.537                | P > 0.05       | ns                |                 |
| 4                                 | 7.46                        | 4.276                | P<0.001        | ***             | 6                               | 0.4575                        | 0.2392               | P > 0.05       | ns                |                 |
| 5                                 | 4.918                       | 2.818                | P < 0.05       | *               | 9                               | -0.4267                       | 0.1789               | P > 0.05       | ns                |                 |
| 6                                 | 8.591                       | 4.955                | P<0.001        | ***             |                                 |                               |                      |                |                   |                 |
| <b>UT/LV.GFP vs S1.3 injected</b> |                             |                      |                |                 | <b>UT/LV.GFP vs S1.3 contra</b> |                               |                      |                |                   |                 |
| Source of Variation               | % of total variation        | P value              |                |                 | Source of Variation             | % of total variation          | P value              |                |                   |                 |
| Interaction                       | 2.16                        | 0.4604               |                |                 | Interaction                     | 6.85                          | 0.1689               |                |                   |                 |
| hem                               | 60.06                       | < 0.0001             |                |                 | hem                             | 37.45                         | 0.0001               |                |                   |                 |
| slice                             | 2.11                        | 0.4699               |                |                 | slice                           | 0.49                          | 0.872                |                |                   |                 |
| Source of Variation               | P value summary             | Significant?         |                |                 | Source of Variation             | P value summary               | Significant?         |                |                   |                 |
| Interaction                       | ns                          | No                   |                |                 | Interaction                     | ns                            | No                   |                |                   |                 |
| hem                               | ***                         | Yes                  |                |                 | hem                             | ***                           | Yes                  |                |                   |                 |
| slice                             | ns                          | No                   |                |                 | slice                           | ns                            | No                   |                |                   |                 |
| Source of Variation               | Df                          | Sum-of-squares       | Mean square    | F               | Source of Variation             | Df                            | Sum-of-squares       | Mean square    | F                 |                 |
| Interaction                       | 3                           | 43.5                 | 14.5           | 0.8784          | Interaction                     | 2                             | 34.05                | 17.02          | 1.911             |                 |
| hem                               | 1                           | 1210                 | 1210           | 73.3            | hem                             | 1                             | 186.2                | 186.2          | 20.91             |                 |
| slice                             | 3                           | 42.57                | 14.19          | 0.8596          | slice                           | 2                             | 2.454                | 1.227          | 0.1377            |                 |
| Residual                          | 40                          | 660.3                | 16.51          |                 | Residual                        | 25                            | 222.7                | 8.907          |                   |                 |
| <b>Bonferroni posttests</b>       |                             |                      |                |                 | <b>Bonferroni posttests</b>     |                               |                      |                |                   |                 |
| slice                             | UT/LV.GFP                   | S1.3 injected        | Difference     | 95% CI of diff. | slice                           | UT+P2 NHPs vs S1.3 U17 contra | S1.3 contra          | Difference     | 95% CI of diff.   |                 |
| 3                                 | 29.74                       | 42.72                | 12.97          | 7.371 to 18.57  | 3                               | 29.35                         | 37.4                 | 8.051          | 3.362 to 12.74    |                 |
| 4                                 | 29.28                       | 41.05                | 11.77          | 4.255 to 19.28  | 6                               | 30.19                         | 35.53                | 5.333          | 0.6429 to 10.02   |                 |
| 5                                 | 29.24                       | 37.87                | 8.624          | 1.764 to 15.48  | 9                               | 32.38                         | 34.75                | 2.373          | -3.476 to 8.222   |                 |
| 6                                 | 30.38                       | 39.22                | 8.841          | 3.240 to 14.44  |                                 |                               |                      |                |                   |                 |
| slice                             | Difference                  | t                    | P value        | Summary         | slice                           | Difference                    | t                    | P value        | Summary           |                 |
| 3                                 | 12.97                       | 6.058                | P<0.001        | ***             | 3                               | 8.051                         | 4.405                | P<0.001        | ***               |                 |
| 4                                 | 11.77                       | 4.097                | P<0.001        | ***             | 6                               | 5.333                         | 2.918                | P < 0.05       | *                 |                 |
| 5                                 | 8.624                       | 3.288                | P < 0.05       | *               | 9                               | 2.373                         | 1.041                | P > 0.05       | ns                |                 |
| 6                                 | 8.841                       | 4.129                | P<0.001        | ***             |                                 |                               |                      |                |                   |                 |

| Figure                      | Statistical analysis       |                      |              |                  |                             | Two-way ANOVA            |                      |              |                 |  |
|-----------------------------|----------------------------|----------------------|--------------|------------------|-----------------------------|--------------------------|----------------------|--------------|-----------------|--|
| Fig.5C                      | Two-way ANOVA              |                      |              |                  |                             | Two-way ANOVA            |                      |              |                 |  |
|                             | UT/LV.GFP vs S2.1 injected |                      |              |                  |                             | UT/LV.GFP vs S2.1 contra |                      |              |                 |  |
|                             | Source of Variation        | % of total variation | P value      |                  |                             | Source of Variation      | % of total variation | P value      |                 |  |
|                             | Interaction                | 0.32                 | 0.9282       |                  |                             | Interaction              | 9.12                 | 0.0613       |                 |  |
|                             | hem                        | 64.46                | < 0.0001     |                  |                             | hem                      | 43.88                | < 0.0001     |                 |  |
|                             | slice                      | 0.36                 | 0.9164       |                  |                             | slice                    | 3.58                 | 0.3103       |                 |  |
|                             | Source of Variation        | P value summary      | Significant? |                  |                             | Source of Variation      | P value summary      | Significant? |                 |  |
|                             | Interaction                | ns                   | No           |                  |                             | Interaction              | ns                   | No           |                 |  |
|                             | hem                        | ***                  | Yes          |                  |                             | hem                      | ***                  | Yes          |                 |  |
|                             | slice                      | ns                   | No           |                  |                             | slice                    | ns                   | No           |                 |  |
| Source of Variation         | Df                         | Sum-of-squares       | Mean square  | F                | Source of Variation         | Df                       | Sum-of-squares       | Mean square  | F               |  |
| Interaction                 | 3                          | 15.41                | 5.137        | 0.1514           | Interaction                 | 2                        | 98.65                | 49.32        | 3.128           |  |
| hem                         | 1                          | 3099                 | 3099         | 91.34            | hem                         | 1                        | 474.7                | 474.7        | 30.1            |  |
| slice                       | 3                          | 17.25                | 5.749        | 0.1694           | slice                       | 2                        | 38.69                | 19.34        | 1.227           |  |
| Residual                    | 40                         | 1357                 | 33.93        |                  | Residual                    | 25                       | 394.2                | 15.77        |                 |  |
| <b>Bonferroni posttests</b> |                            |                      |              |                  | <b>Bonferroni posttests</b> |                          |                      |              |                 |  |
| slice                       | UT/LV.GFP                  | S2.1 injected        | Difference   | 95% CI of diff.  | slice                       | UT/LV.GFP                | S2.1 contra          | Difference   | 95% CI of diff. |  |
| 3                           | 29.74                      | 46.5                 | 16.76        | 9.352 to 24.16   | 3                           | 29.35                    | 42.93                | 13.58        | 7.337 to 19.82  |  |
| 4                           | 29.28                      | 48.68                | 19.39        | 8.621 to 30.17   | 6                           | 30.19                    | 36.7                 | 6.508        | 0.2679 to 12.75 |  |
| 5                           | 29.24                      | 45                   | 15.76        | 4.984 to 26.53   | 9                           | 32.38                    | 37.45                | 5.073        | -2.709 to 12.86 |  |
| 6                           | 30.38                      | 46.97                | 16.59        | 8.561 to 24.62   |                             |                          |                      |              |                 |  |
| slice                       | Difference                 | t                    | P value      | Summary          | slice                       | Difference               | t                    | P value      | Summary         |  |
| 3                           | 16.76                      | 5.92                 | P<0.001      | ***              | 3                           | 13.58                    | 5.583                | P<0.001      | ***             |  |
| 4                           | 19.39                      | 4.709                | P<0.001      | ***              | 6                           | 6.508                    | 2.676                | P > 0.05     | ns              |  |
| 5                           | 15.76                      | 3.826                | P<0.01       | **               | 9                           | 5.073                    | 1.673                | P > 0.05     | ns              |  |
| 6                           | 16.59                      | 5.404                | P<0.001      | ***              |                             |                          |                      |              |                 |  |
| UT/LV.GFP vs S2.2 injected  |                            |                      |              |                  | UT/LV.GFP vs S2.2 contra    |                          |                      |              |                 |  |
| Source of Variation         | % of total variation       | P value              |              |                  | Source of Variation         | % of total variation     | P value              |              |                 |  |
| Interaction                 | 9.33                       | 0.0217               |              |                  | Interaction                 | 6.48                     | 0.1947               |              |                 |  |
| TREATMENT                   | 28.46                      | < 0.0001             |              |                  | hem                         | 22.53                    | < 0.0001             |              |                 |  |
| SLICES                      | 10.18                      | < 0.0001             |              |                  | slice                       | 10.7                     | 0.0276               |              |                 |  |
| Source of Variation         | P value summary            | Significant?         |              |                  | Source of Variation         | P value summary          | Significant?         |              |                 |  |
| Interaction                 | *                          | Yes                  |              |                  | Interaction                 | ns                       | No                   |              |                 |  |
| TREATMENT                   | ***                        | Yes                  |              |                  | hem                         | ***                      | Yes                  |              |                 |  |
| SLICES                      | ***                        | Yes                  |              |                  | slice                       | *                        | Yes                  |              |                 |  |
| Source of Variation         | Df                         | Sum-of-squares       | Mean square  | F                | Source of Variation         | Df                       | Sum-of-squares       | Mean square  | F               |  |
| Interaction                 | 28                         | 1592                 | 56.85        | 1.678            | Interaction                 | 7                        | 277.8                | 39.69        | 1.458           |  |
| TREATMENT                   | 4                          | 4859                 | 1215         | 35.85            | hem                         | 1                        | 966.4                | 966.4        | 35.5            |  |
| SLICES                      | 7                          | 1738                 | 248.2        | 7.327            | slice                       | 7                        | 459                  | 65.57        | 2.409           |  |
| Residual                    | 225                        | 7622                 | 33.88        |                  | Residual                    | 78                       | 2123                 | 27.22        |                 |  |
| <b>Bonferroni posttests</b> |                            |                      |              |                  | <b>Bonferroni posttests</b> |                          |                      |              |                 |  |
| SLICES                      | UT+P2 NHPs                 | S2.2 INJ hemisph     | Difference   | 95% CI of diff.  | slice                       | UT+P2 NHPs               | S2.2 CONTRAL hem     | Difference   | 95% CI of diff. |  |
| 2                           | 29.92                      | 39.19                | 9.265        | -5.952 to 24.48  | 2                           | 29.92                    | 33.59                | 3.668        | -8.304 to 15.64 |  |
| 3                           | 29.74                      | 50.9                 | 21.15        | 12.10 to 30.21   | 3                           | 29.74                    | 38.7                 | 8.954        | 1.226 to 16.68  |  |
| 4                           | 29.28                      | 43.9                 | 14.62        | 3.419 to 25.82   | 4                           | 29.28                    | 35.19                | 5.908        | -3.557 to 15.37 |  |
| 5                           | 29.24                      | 44.11                | 14.87        | 3.189 to 26.55   | 5                           | 29.24                    | 35.51                | 6.267        | -3.198 to 15.73 |  |
| 6                           | 30.38                      | 38.29                | 7.914        | -0.4621 to 16.29 | 6                           | 30.38                    | 36.99                | 6.616        | -1.112 to 14.34 |  |
| 7                           | 31.15                      | 38.33                | 7.18         | -1.038 to 15.40  | 7                           | 31.15                    | 33.43                | 2.284        | -5.048 to 9.616 |  |
| 8                           | 31.71                      | 45.91                | 14.2         | 1.342 to 27.06   | 8                           | 31.71                    | 38.73                | 7.02         | -3.349 to 17.39 |  |
| 9                           | 32.38                      | 42                   | 9.619        | -3.991 to 23.23  | 9                           | 32.38                    | 48.18                | 15.8         | 5.433 to 26.17  |  |
| SLICES                      | Difference                 | t                    | P value      | Summary          | slice                       | Difference               | t                    | P value      | Summary         |  |
| 2                           | 9.265                      | 1.95                 | P > 0.05     | ns               | 2                           | 3.668                    | 0.8611               | P > 0.05     | ns              |  |
| 3                           | 21.15                      | 7.48                 | P<0.001      | ***              | 3                           | 8.954                    | 3.256                | P < 0.05     | *               |  |
| 4                           | 14.62                      | 4.179                | P<0.001      | ***              | 4                           | 5.908                    | 1.754                | P > 0.05     | ns              |  |
| 5                           | 14.87                      | 4.076                | P<0.001      | ***              | 5                           | 6.267                    | 1.861                | P > 0.05     | ns              |  |
| 6                           | 7.914                      | 3.025                | P < 0.05     | *                | 6                           | 6.616                    | 2.406                | P > 0.05     | ns              |  |
| 7                           | 7.18                       | 2.797                | P < 0.05     | *                | 7                           | 2.284                    | 0.8756               | P > 0.05     | ns              |  |
| 8                           | 14.2                       | 3.536                | P<0.01       | **               | 8                           | 7.02                     | 1.903                | P > 0.05     | ns              |  |
| 9                           | 9.619                      | 2.263                | P > 0.05     | ns               | 9                           | 15.8                     | 4.263                | P<0.001      | ***             |  |
| UT/LV.GFP vs S2.3 injected  |                            |                      |              |                  | UT/LV.GFP vs S2.3 contra    |                          |                      |              |                 |  |
| Source of Variation         | % of total variation       | P value              |              |                  | Source of Variation         | % of total variation     | P value              |              |                 |  |
| Interaction                 | 1.18                       | 0.6394               |              |                  | Interaction                 | 0.03                     | 0.9893               |              |                 |  |
| hem                         | 66.45                      | < 0.0001             |              |                  | hem                         | 46.7                     | < 0.0001             |              |                 |  |
| slice                       | 0.66                       | 0.8114               |              |                  | slice                       | 4.23                     | 0.2795               |              |                 |  |
| Source of Variation         | P value summary            | Significant?         |              |                  | Source of Variation         | P value summary          | Significant?         |              |                 |  |
| Interaction                 | ns                         | No                   |              |                  | Interaction                 | ns                       | No                   |              |                 |  |
| hem                         | ***                        | Yes                  |              |                  | hem                         | ***                      | Yes                  |              |                 |  |
| slice                       | ns                         | No                   |              |                  | slice                       | ns                       | No                   |              |                 |  |
| Source of Variation         | Df                         | Sum-of-squares       | Mean square  | F                | Source of Variation         | Df                       | Sum-of-squares       | Mean square  | F               |  |
| Interaction                 | 3                          | 34.05                | 11.35        | 0.5678           | Interaction                 | 2                        | 0.3752               | 0.1876       | 0.01072         |  |
| hem                         | 1                          | 1913                 | 1913         | 95.71            | hem                         | 1                        | 519                  | 519          | 29.67           |  |
| slice                       | 3                          | 19.14                | 6.38         | 0.3192           | slice                       | 2                        | 46.97                | 23.48        | 1.342           |  |
| Residual                    | 41                         | 819.5                | 19.99        |                  | Residual                    | 25                       | 437.4                | 17.5         |                 |  |
| <b>Bonferroni posttests</b> |                            |                      |              |                  | <b>Bonferroni posttests</b> |                          |                      |              |                 |  |
| slice                       | UT/LV.GFP                  | S2.3 injected        | Difference   | 95% CI of diff.  | slice                       | UT/LV.GFP                | S2.3 contra          | Difference   | 95% CI of diff. |  |
| 3                           | 29.74                      | 41.55                | 11.81        | 5.649 to 17.96   | 3                           | 29.35                    | 37.9                 | 8.551        | 1.979 to 15.12  |  |
| 4                           | 29.28                      | 45.68                | 16.4         | 8.135 to 24.65   | 6                           | 30.19                    | 38.83                | 8.633        | 2.060 to 15.21  |  |
| 5                           | 29.24                      | 42.34                | 13.1         | 5.942 to 20.25   | 9                           | 32.38                    | 41.5                 | 9.123        | 0.9258 to 17.32 |  |
| slice                       | Difference                 | t                    | P value      | Summary          | slice                       | Difference               | t                    | P value      | Summary         |  |
| 3                           | 11.81                      | 5.01                 | P<0.001      | ***              | 3                           | 8.551                    | 3.338                | P < 0.05     | *               |  |
| 4                           | 16.4                       | 5.186                | P<0.001      | ***              | 6                           | 8.633                    | 3.37                 | P<0.01       | **              |  |
| 5                           | 13.1                       | 4.783                | P<0.001      | ***              | 9                           | 9.123                    | 2.856                | P < 0.05     | *               |  |

| Figure        | Statistical analysis                         |            |       |                        |         |                   |
|---------------|----------------------------------------------|------------|-------|------------------------|---------|-------------------|
| <b>Fig.5D</b> | <b>One-way analysis of variance</b>          |            |       |                        |         |                   |
|               | P value                                      | < 0.0001   |       |                        |         |                   |
|               | P value summary                              | ***        |       |                        |         |                   |
|               | Are means signif. different? (P < 0.05)      | Yes        |       |                        |         |                   |
|               | Number of groups                             | 5          |       |                        |         |                   |
|               | F                                            | 50.61      |       |                        |         |                   |
|               | R squared                                    | 0.3488     |       |                        |         |                   |
|               | ANOVA Table                                  | SS         | df    | MS                     |         |                   |
|               | Treatment (between columns)                  | 8173       | 4     | 2043                   |         |                   |
|               | Residual (within columns)                    | 15260      | 378   | 40.37                  |         |                   |
|               | Total                                        | 23430      | 382   |                        |         |                   |
|               | <b>Tukey's Multiple Comparison Test</b>      | Mean Diff. | q     | Significant? P < 0.05? | Summary | 95% CI of diff    |
|               | normal controls vs Study group 1 inj         | -9.979     | 13.01 | Yes                    | ***     | -12.98 to -6.979  |
|               | normal controls vs Study group 1 contra      | -2.141     | 2.418 | No                     | ns      | -5.605 to 1.323   |
|               | normal controls vs Stoudy group 2 inj        | -13.12     | 17.05 | Yes                    | ***     | -16.13 to -10.11  |
|               | normal controls vs Study group 2 contra      | -7.533     | 9.161 | Yes                    | ***     | -10.75 to -4.317  |
|               | Study group 1 inj vs Study group 1 contra    | 7.838      | 10.29 | Yes                    | ***     | 4.857 to 10.82    |
|               | Study group 1 inj vs Stoudy group 2 inj      | -3.139     | 5.038 | Yes                    | **      | -5.576 to -0.7017 |
|               | Study group 1 inj vs Study group 2 contra    | 2.445      | 3.557 | No                     | ns      | -0.2440 to 5.134  |
|               | Study group 1 contra vs Stoudy group 2 inj   | -10.98     | 14.36 | Yes                    | ***     | -13.97 to -7.987  |
|               | Study group 1 contra vs Study group 2 contra | -5.392     | 6.595 | Yes                    | ***     | -8.591 to -2.194  |
|               | Stoudy group 2 inj vs Study group 2 contra   | 5.584      | 8.091 | Yes                    | ***     | 2.885 to 8.284    |

| Figure        | Statistical analysis                      |            |       |                        |         |                   |
|---------------|-------------------------------------------|------------|-------|------------------------|---------|-------------------|
| <b>Fig.5E</b> | <b>One-way analysis of variance</b>       |            |       |                        |         |                   |
|               | P value                                   | 0.0422     |       |                        |         |                   |
|               | P value summary                           | *          |       |                        |         |                   |
|               | Are means signif. different? (P < 0.05)   | Yes        |       |                        |         |                   |
|               | Number of groups                          | 3          |       |                        |         |                   |
|               | F                                         | 3.461      |       |                        |         |                   |
|               | R squared                                 | 0.1613     |       |                        |         |                   |
|               | ANOVA Table                               | SS         | df    | MS                     |         |                   |
|               | Treatment (between columns)               | 379.7      | 2     | 189.8                  |         |                   |
|               | Residual (within columns)                 | 1975       | 36    | 54.85                  |         |                   |
|               | Total                                     | 2354       | 38    |                        |         |                   |
|               | <b>Dunnett's Multiple Comparison Test</b> | Mean Diff. | q     | Significant? P < 0.05? | Summary | 95% CI of diff    |
|               | Pilot group vs Study group 1              | -7.57      | 2.592 | Yes                    | *       | -14.30 to -0.8406 |
|               | Pilot group vs Study group 2              | -3.896     | 1.375 | No                     | ns      | -10.43 to 2.634   |



| Figure        | Statistical analysis        |                      |                |             |                    |
|---------------|-----------------------------|----------------------|----------------|-------------|--------------------|
| <b>Fig.7A</b> | <b>Two-way ANOVA</b>        |                      |                |             |                    |
|               | Source of Variation         | % of total variation | P value        |             |                    |
|               | Interaction                 | 23.05                | 0.0057         |             |                    |
|               | treat                       | 22.33                | < 0.0001       |             |                    |
|               | slice                       | 21.24                | < 0.0001       |             |                    |
|               | Source of Variation         | P value summary      | Significant?   |             |                    |
|               | Interaction                 | **                   | Yes            |             |                    |
|               | treat                       | ***                  | Yes            |             |                    |
|               | slice                       | ***                  | Yes            |             |                    |
|               | Source of Variation         | Df                   | Sum-of-squares | Mean square | F                  |
|               | Interaction                 | 16                   | 10.15          | 0.6341      | 2.608              |
|               | treat                       | 4                    | 9.827          | 2.457       | 10.1               |
|               | slice                       | 4                    | 9.351          | 2.338       | 9.615              |
|               | Residual                    | 46                   | 11.18          | 0.2431      |                    |
|               | <b>Bonferroni posttests</b> |                      |                |             |                    |
|               | UT WT vs JT02 inj           |                      |                |             |                    |
|               | slice                       | UT WT                | JT02 inj       | Difference  | 95% CI of diff.    |
|               | 5                           | 1.77                 | 1.235          | -0.535      | -2.112 to 1.042    |
|               | 7                           | 2.32                 | 1.28           | -1.04       | -2.972 to 0.8917   |
|               | 9                           | 2.033                | 0.79           | -1.243      | -2.447 to -0.03785 |
|               | 11                          | 1.933                | 1.757          | -0.1758     | -1.380 to 1.029    |
|               | 15                          | 1.603                | 1.42           | -0.1825     | -1.548 to 1.183    |
|               | slice                       | Difference           | t              | P value     | Summary            |
|               | 5                           | -0.535               | 1.085          | P > 0.05    | ns                 |
|               | 7                           | -1.04                | 1.722          | P > 0.05    | ns                 |
|               | 9                           | -1.243               | 3.299          | P < 0.01    | **                 |
|               | 11                          | -0.1758              | 0.4669         | P > 0.05    | ns                 |
|               | 15                          | -0.1825              | 0.4274         | P > 0.05    | ns                 |
|               | UT WT vs JT02 contra        |                      |                |             |                    |
|               | slice                       | UT WT                | JT02 contra    | Difference  | 95% CI of diff.    |
|               | 5                           | 1.77                 | 0.855          | -0.915      | -2.492 to 0.6623   |
|               | 7                           | 2.32                 | 0.71           | -1.61       | -3.187 to -0.03274 |
|               | 9                           | 2.033                | 1.144          | -0.8885     | -1.947 to 0.1696   |
|               | 11                          | 1.933                | 1.79           | -0.1425     | -1.258 to 0.9728   |
|               | 15                          | 1.603                | 1.685          | 0.0825      | -1.283 to 1.448    |
|               | slice                       | Difference           | t              | P value     | Summary            |
|               | 5                           | -0.915               | 1.856          | P > 0.05    | ns                 |
|               | 7                           | -1.61                | 3.265          | P < 0.05    | *                  |
|               | 9                           | -0.8885              | 2.686          | P > 0.05    | ns                 |
|               | 11                          | -0.1425              | 0.4087         | P > 0.05    | ns                 |
|               | 15                          | 0.0825               | 0.1932         | P > 0.05    | ns                 |
|               | UT WT vs JV02 inj           |                      |                |             |                    |
|               | slice                       | UT WT                | JV02 inj       | Difference  | 95% CI of diff.    |
|               | 5                           | 1.77                 | 2.11           | 0.34        | -1.237 to 1.917    |
|               | 7                           | 2.32                 | 1.03           | -1.29       | -3.222 to 0.6417   |
|               | 9                           | 2.033                | 1.56           | -0.4725     | -1.531 to 0.5856   |
|               | 11                          | 1.933                | 2.273          | 0.3408      | -0.8638 to 1.545   |
|               | 15                          | 1.603                | 2.725          | 1.123       | -0.2434 to 2.488   |
|               | slice                       | Difference           | t              | P value     | Summary            |
|               | 5                           | 0.34                 | 0.6895         | P > 0.05    | ns                 |
|               | 7                           | -1.29                | 2.136          | P > 0.05    | ns                 |
|               | 9                           | -0.4725              | 1.428          | P > 0.05    | ns                 |
|               | 11                          | 0.3408               | 0.905          | P > 0.05    | ns                 |
|               | 15                          | 1.123                | 2.629          | P > 0.05    | ns                 |
|               | UT WT vs JV02 contra        |                      |                |             |                    |
|               | slice                       | UT WT                | JV02 contra    | Difference  | 95% CI of diff.    |
|               | 5                           | 1.77                 | 1.78           | 0.01        | -1.430 to 1.450    |
|               | 7                           | 2.32                 | 1.41           | -0.91       | -2.842 to 1.022    |
|               | 9                           | 2.033                | 1.868          | -0.1642     | -1.182 to 0.8539   |
|               | 11                          | 1.933                | 3.775          | 1.843       | 0.7272 to 2.958    |
|               | 15                          | 1.603                | 2.8            | 1.198       | -0.1684 to 2.563   |
|               | slice                       | Difference           | t              | P value     | Summary            |
|               | 5                           | 0.01                 | 0.02222        | P > 0.05    | ns                 |
|               | 7                           | -0.91                | 1.507          | P > 0.05    | ns                 |
|               | 9                           | -0.1642              | 0.5158         | P > 0.05    | ns                 |
|               | 11                          | 1.843                | 5.284          | P < 0.001   | ***                |
|               | 15                          | 1.198                | 2.804          | P < 0.05    | *                  |

| <b>Fig.7B One-way analysis of variance</b>   |            |          |       |                |                   |
|----------------------------------------------|------------|----------|-------|----------------|-------------------|
| P value                                      |            | < 0.0001 |       |                |                   |
| P value summary                              |            | ***      |       |                |                   |
| Are means signif. different? (P < 0.05)      | Yes        |          |       |                |                   |
| Number of groups                             |            | 3        |       |                |                   |
| F                                            |            | 18.26    |       |                |                   |
| R squared                                    |            | 0.3824   |       |                |                   |
| <b>Bartlett's test for equal variances</b>   |            |          |       |                |                   |
| Bartlett's statistic (corrected)             |            | 23.54    |       |                |                   |
| P value                                      |            | < 0.0001 |       |                |                   |
| P value summary                              |            | ***      |       |                |                   |
| Do the variances differ signif. (P < 0.05)   | Yes        |          |       |                |                   |
| <b>ANOVA Table</b>                           |            |          |       |                |                   |
|                                              | SS         |          | df    | MS             | 95% CI of diff    |
| Treatment (between columns)                  | 23.25      |          | 2     | 11.63          | -1.452 to -0.2465 |
| Residual (within columns)                    | 37.56      |          | 59    | 0.6366         | -0.02271 to 1.162 |
| Total                                        | 60.81      |          | 61    |                |                   |
| <b>Bonferroni's Multiple Comparison Test</b> |            |          |       |                |                   |
|                                              | Mean Diff. |          | t     | Significant? P | Summary           |
| wt vs JV02                                   | -0.8494    |          | 3.24  | Yes            | **                |
| wt vs JT02                                   | 0.5696     |          | 2.212 | No             | ns                |

| <b>Fig.7C One-way analysis of variance</b> |            |        |       |                |                  |
|--------------------------------------------|------------|--------|-------|----------------|------------------|
| P value                                    |            | 0.0227 |       |                |                  |
| P value summary                            |            | *      |       |                |                  |
| Are means signif. different? (P < 0.05)    | Yes        |        |       |                |                  |
| Number of groups                           |            | 3      |       |                |                  |
| F                                          |            | 7.598  |       |                |                  |
| R squared                                  |            | 0.7169 |       |                |                  |
| <b>ANOVA Table</b>                         |            |        |       |                |                  |
|                                            | SS         |        | df    | MS             | 95% CI of diff   |
| Treatment (between columns)                | 1.882      |        | 2     | 0.941          | -0.3726 to 1.273 |
| Residual (within columns)                  | 0.7431     |        | 6     | 0.1239         | 0.2907 to 1.936  |
| Total                                      | 2.625      |        | 8     |                |                  |
| <b>Dunnett's Multiple Comparison Test</b>  |            |        |       |                |                  |
|                                            | Mean Diff. |        | q     | Significant? P | Summary          |
| SC WT vs SC JV02                           | 0.45       |        | 1.566 | No             | ns               |
| SC WT vs SC JT02                           | 1.113      |        | 3.874 | Yes            | *                |

| <b>Fig.7F Two-way ANOVA</b> |                      |          |                |             |                    |
|-----------------------------|----------------------|----------|----------------|-------------|--------------------|
| Source of Variation         | % of total variation |          | P value        |             |                    |
| Interaction                 | 1.12                 |          | 0.7746         |             |                    |
| genotype                    | 41.05                |          | < 0.0001       |             |                    |
| age                         | 1.83                 |          | 0.5748         |             |                    |
| Source of Variation         | P value summary      |          | Significant?   |             |                    |
| Interaction                 | ns                   |          | No             |             |                    |
| genotype                    | ***                  |          | Yes            |             |                    |
| age                         | ns                   |          | No             |             |                    |
| Source of Variation         | Df                   |          | Sum-of-squares | Mean square | F                  |
| Interaction                 | 4                    |          | 5.372          | 1.343       | 0.4466             |
| genotype                    | 1                    |          | 196.2          | 196.2       | 65.25              |
| age                         | 4                    |          | 8.764          | 2.191       | 0.7285             |
| Residual                    | 89                   |          | 267.6          | 3.007       |                    |
| <b>Bonferroni posttests</b> |                      |          |                |             |                    |
| Normal vs Affected          |                      |          |                |             |                    |
| age                         | Normal               | Affected | Difference     |             | 95% CI of diff.    |
| 2m                          | 6.9                  | 3.75     | -3.15          |             | -4.817 to -1.483   |
| 3m                          | 7.8                  | 4.18     | -3.62          |             | -5.388 to -1.852   |
| 4m                          | 8.23                 | 4.54     | -3.69          |             | -5.943 to -1.437   |
| 5m                          | 8.5                  | 3.9      | -4.6           |             | -7.364 to -1.836   |
| 6m                          | 9                    | 4.07     | -4.93          |             | -9.810 to -0.05013 |
| age                         | Difference           | t        | P value        |             | Summary            |
| 2m                          | -3.15                | 4.975    | P<0.001        |             | ***                |
| 3m                          | -3.62                | 5.39     | P<0.001        |             | ***                |
| 4m                          | -3.69                | 4.311    | P<0.001        |             | ***                |
| 5m                          | -4.6                 | 4.381    | P<0.001        |             | ***                |
| 6m                          | -4.93                | 2.659    | P < 0.05       |             | *                  |

| Figure           | Statistical analysis                         |          |                |         |                |                  |
|------------------|----------------------------------------------|----------|----------------|---------|----------------|------------------|
| <b>Fig.EV2 C</b> | <b>One-way analysis of variance</b>          |          |                |         |                |                  |
|                  | P value                                      | < 0.0001 |                |         |                |                  |
|                  | P value summary                              | ***      |                |         |                |                  |
|                  | Are means signif. different? (P < 0.05)      | Yes      |                |         |                |                  |
|                  | Number of groups                             | 5        |                |         |                |                  |
|                  | F                                            | 324.2    |                |         |                |                  |
|                  | R squared                                    | 0.9767   |                |         |                |                  |
|                  | Bartlett's test for equal variances          |          |                |         |                |                  |
|                  | Bartlett's statistic (corrected)             | 2.273    |                |         |                |                  |
|                  | P value                                      | 0.6857   |                |         |                |                  |
|                  | P value summary                              | ns       |                |         |                |                  |
|                  | Do the variances differ signif. (P < 0.05)   | No       |                |         |                |                  |
|                  | ANOVA Table                                  |          |                |         |                |                  |
|                  |                                              | SS       | df             | MS      |                |                  |
|                  | Treatment (between columns)                  | 1655     | 4              | 413.7   |                |                  |
|                  | Residual (within columns)                    | 39.55    | 31             | 1.276   |                |                  |
|                  | Total                                        | 1694     | 35             |         |                |                  |
|                  | <b>Bonferroni's Multiple Comparison Test</b> |          |                |         |                |                  |
|                  | Mean Diff.                                   | t        | Significant? P | Summary | 95% CI of diff |                  |
|                  | P2 vs S1.1 injected                          | -17.72   | 31.38          | Yes     | ***            | -19.43 to -16.01 |
|                  | P2 vs S1.1 contralateral                     | -12.71   | 22.51          | Yes     | ***            | -14.42 to -11.01 |
|                  | P2 vs S2.2 injected                          | -12.32   | 21.81          | Yes     | ***            | -14.03 to -10.61 |
|                  | P2 vs S2.2 contra                            | -12.64   | 22.38          | Yes     | ***            | -14.34 to -10.93 |
|                  | S1.1 injected vs S1.1 contralateral          | 5.008    | 7.68           | Yes     | ***            | 3.038 to 6.979   |
|                  | S1.1 injected vs S2.2 injected               | 5.402    | 8.283          | Yes     | ***            | 3.431 to 7.372   |
|                  | S1.1 injected vs S2.2 contra                 | 5.085    | 7.797          | Yes     | ***            | 3.114 to 7.056   |
|                  | S1.1 contralateral vs S2.2 injected          | 0.3933   | 0.6031         | No      | ns             | -1.577 to 2.364  |
|                  | S1.1 contralateral vs S2.2 contra            | 0.07667  | 0.1176         | No      | ns             | -1.894 to 2.047  |
|                  | S2.2 injected vs S2.2 contra                 | -0.3167  | 0.4856         | No      | ns             | -2.288 to 1.654  |

| Figure         | Statistical analysis                       |        |                |         |                |                  |
|----------------|--------------------------------------------|--------|----------------|---------|----------------|------------------|
| <b>Fig.EV5</b> | <b>One-way analysis of variance</b>        |        |                |         |                |                  |
|                | P value                                    | 0.0225 |                |         |                |                  |
|                | P value summary                            | *      |                |         |                |                  |
|                | Are means signif. different? (P < 0.05)    | Yes    |                |         |                |                  |
|                | Number of groups                           | 7      |                |         |                |                  |
|                | F                                          | 3.258  |                |         |                |                  |
|                | R squared                                  | 0.5071 |                |         |                |                  |
|                | ANOVA Table                                |        |                |         |                |                  |
|                |                                            | SS     | df             | MS      |                |                  |
|                | Treatment (between columns)                | 711.4  | 6              | 118.6   |                |                  |
|                | Residual (within columns)                  | 691.4  | 19             | 36.39   |                |                  |
|                | Total                                      | 1403   | 25             |         |                |                  |
|                | <b>Dunnnett's Multiple Comparison Test</b> |        |                |         |                |                  |
|                | Mean Diff.                                 | q      | Significant? P | Summary | 95% CI of diff |                  |
|                | KD UT vs JT02 slice 5 inj.                 | -2.84  | 0.5157         | No      | ns             | -18.34 to 12.66  |
|                | KD UT vs JT02 slice 7 inj.                 | -2.343 | 0.5494         | No      | ns             | -14.35 to 9.664  |
|                | KD UT vs JT02 slice 9 inj.                 | -1.463 | 0.3174         | No      | ns             | -14.43 to 11.51  |
|                | KD UT vs JT02 slice 11 inj.                | -17.59 | 3.571          | Yes     | *              | -31.45 to -3.722 |
|                | KD UT vs JT02 slice 13 inj.                | -2.688 | 0.5833         | No      | ns             | -15.66 to 10.28  |
|                | KD UT vs JT02 slice 15 inj.                | 0.085  | 0.01845        | No      | ns             | -12.88 to 13.05  |

| Figure         | Statistical analysis                   |                        |         |    |
|----------------|----------------------------------------|------------------------|---------|----|
| <b>Table 2</b> | <b>Kruskal-Wallis test</b>             |                        |         |    |
|                | P value                                | 0.0761                 |         |    |
|                | Exact or approximate P value?          | Gaussian Approximation |         |    |
|                | P value summary                        | ns                     |         |    |
|                | Do the medians vary signif. (P < 0.05) | No                     |         |    |
|                | Number of groups                       | 3                      |         |    |
|                | Kruskal-Wallis statistic               | 5.152                  |         |    |
|                | <b>Dunn's Multiple Comparison Test</b> |                        |         |    |
|                | Difference in rank sum                 | Significant? P < 0.05? | Summary |    |
|                | Pilot group inj vs Study group 2 inj   | -1.917                 | No      | ns |
|                | Study group 1 inj vs Study group 2 inj | -4.5                   | Yes     | *  |
|                | <b>Kruskal-Wallis test</b>             |                        |         |    |
|                | P value                                | 0.0513                 |         |    |
|                | Exact or approximate P value?          | Gaussian Approximation |         |    |
|                | P value summary                        | ns                     |         |    |
|                | Do the medians vary signif. (P < 0.05) | No                     |         |    |
|                | Number of groups                       | 3                      |         |    |
|                | Kruskal-Wallis statistic               | 5.939                  |         |    |
|                | <b>Dunn's Multiple Comparison Test</b> |                        |         |    |
|                | Difference in rank sum                 | Significant? P < 0.05? | Summary |    |
|                | Pilot group tot vs Study group 2 tot   | -2.083                 | No      | ns |
|                | Study group 1 tot vs Study group 2 tot | -4.833                 | Yes     | *  |

## References

- Annoni A, Brown BD, Cantore A, Sergi LS, Naldini L, Roncarolo MG (2009) In vivo delivery of a microRNA-regulated transgene induces antigen-specific regulatory T cells and promotes immunologic tolerance. *Blood* 114: 5152-5161
- Bayley A (2000) Narrowing the gap. *J Med Ethics* 26: 51-53
- Brazelton TB (1973) Assessment of the infant at risk. *Clin Obstet Gynecol* 16: 361-375
- Champoux M, Bennett A, Shannon C, Higley JD, Lesch KP, Suomi SJ (2002a) Serotonin transporter gene polymorphism, differential early rearing, and behavior in rhesus monkey neonates. *Mol Psychiatry* 7: 1058-1063
- Champoux M, Hibbeln JR, Shannon C, Majchrzak S, Suomi SJ, Salem N, Jr., Higley JD (2002b) Fatty acid formula supplementation and neuromotor development in rhesus monkey neonates. *Pediatric research* 51: 273-281
- Champoux M, Higley JD, Suomi SJ (1997) Behavioral and physiological characteristics of Indian and Chinese-Indian hybrid rhesus macaque infants. *Dev Psychobiol* 31: 49-63
- Champoux M, Suomi SJ, Schneider ML (1994) Temperament differences between captive Indian and Chinese-Indian hybrid rhesus macaque neonates. *Lab Anim Sci* 44: 351-357
- Lattanzi A, Neri M, Maderna C, di Girolamo I, Martino S, Orlacchio A, Amendola M, Naldini L, Gritti A (2010) Widespread enzymatic correction of CNS tissues by a single intracerebral injection of therapeutic lentiviral vector in leukodystrophy mouse models. *Human molecular genetics* 19: 2208-2227
- Neri M, Ricca A, di Girolamo I, Alcalá-Franco B, Cavazzin C, Orlacchio A, Martino S, Naldini L, Gritti A (2011) Neural stem cell gene therapy ameliorates pathology and function in a mouse model of globoid cell leukodystrophy. *Stem Cells* 29: 1559-1571
